# Supplementary material for: Total Fat and Fatty Acid Intake among 1–7-Year-Old Children from 33 Countries: Comparison with International Recommendations
Source: MDPI journal article supplement (doi:10.3390/nu13103547), 2021-10-09

### **Supplementary Figure Legends:**

*Values used to build the figures can be found in Tables S4 to S7; when the study provided more than one intake value for a given fatty acid and a given age (e.g. a value for boys and a value for girls) the worst case value (i.e. the value which was the furthest from the recommended value) was used for the figure.*

**Figure S1:** Mean/ median total fat intake (percentage total daily energy intake [%E]) for children aged (A) 1-2 years; (B) 2-3 years; (C) 3-5 years; (D) 5-7 years.

**Figure S2:** Mean/ median total SFA intake (percentage total daily energy intake [%E]) for children aged (A) 2-3 years; (B) 3-5 years; (C) 5-7 years.

**Figure S3:** Mean / median linoleic acid (LA) intake (percentage total daily energy intake [%E]) for children aged (A) 1-2 years; (B) 2-3 years; (C) 3-5 years; (D) 5-7 years.

**Figure S4:** Mean/ median alpha-linoleic acid (ALA) intake (percentage total daily energy intake [%E]) for children aged (A) 1-2 years; (B) 2-3 years; (C) 3-5 years; (D) 5-7 years.

**Figure S5:** Mean/ median docosahexaenoic acid (DHA) and sum of DHA + eicosapentaenoic acid (EPA) intake (mg/ day) for children aged (A) 1-2 years; (B) 2-3 years; (C) 3-5 years; (D) 5-7 years.

Figure S1

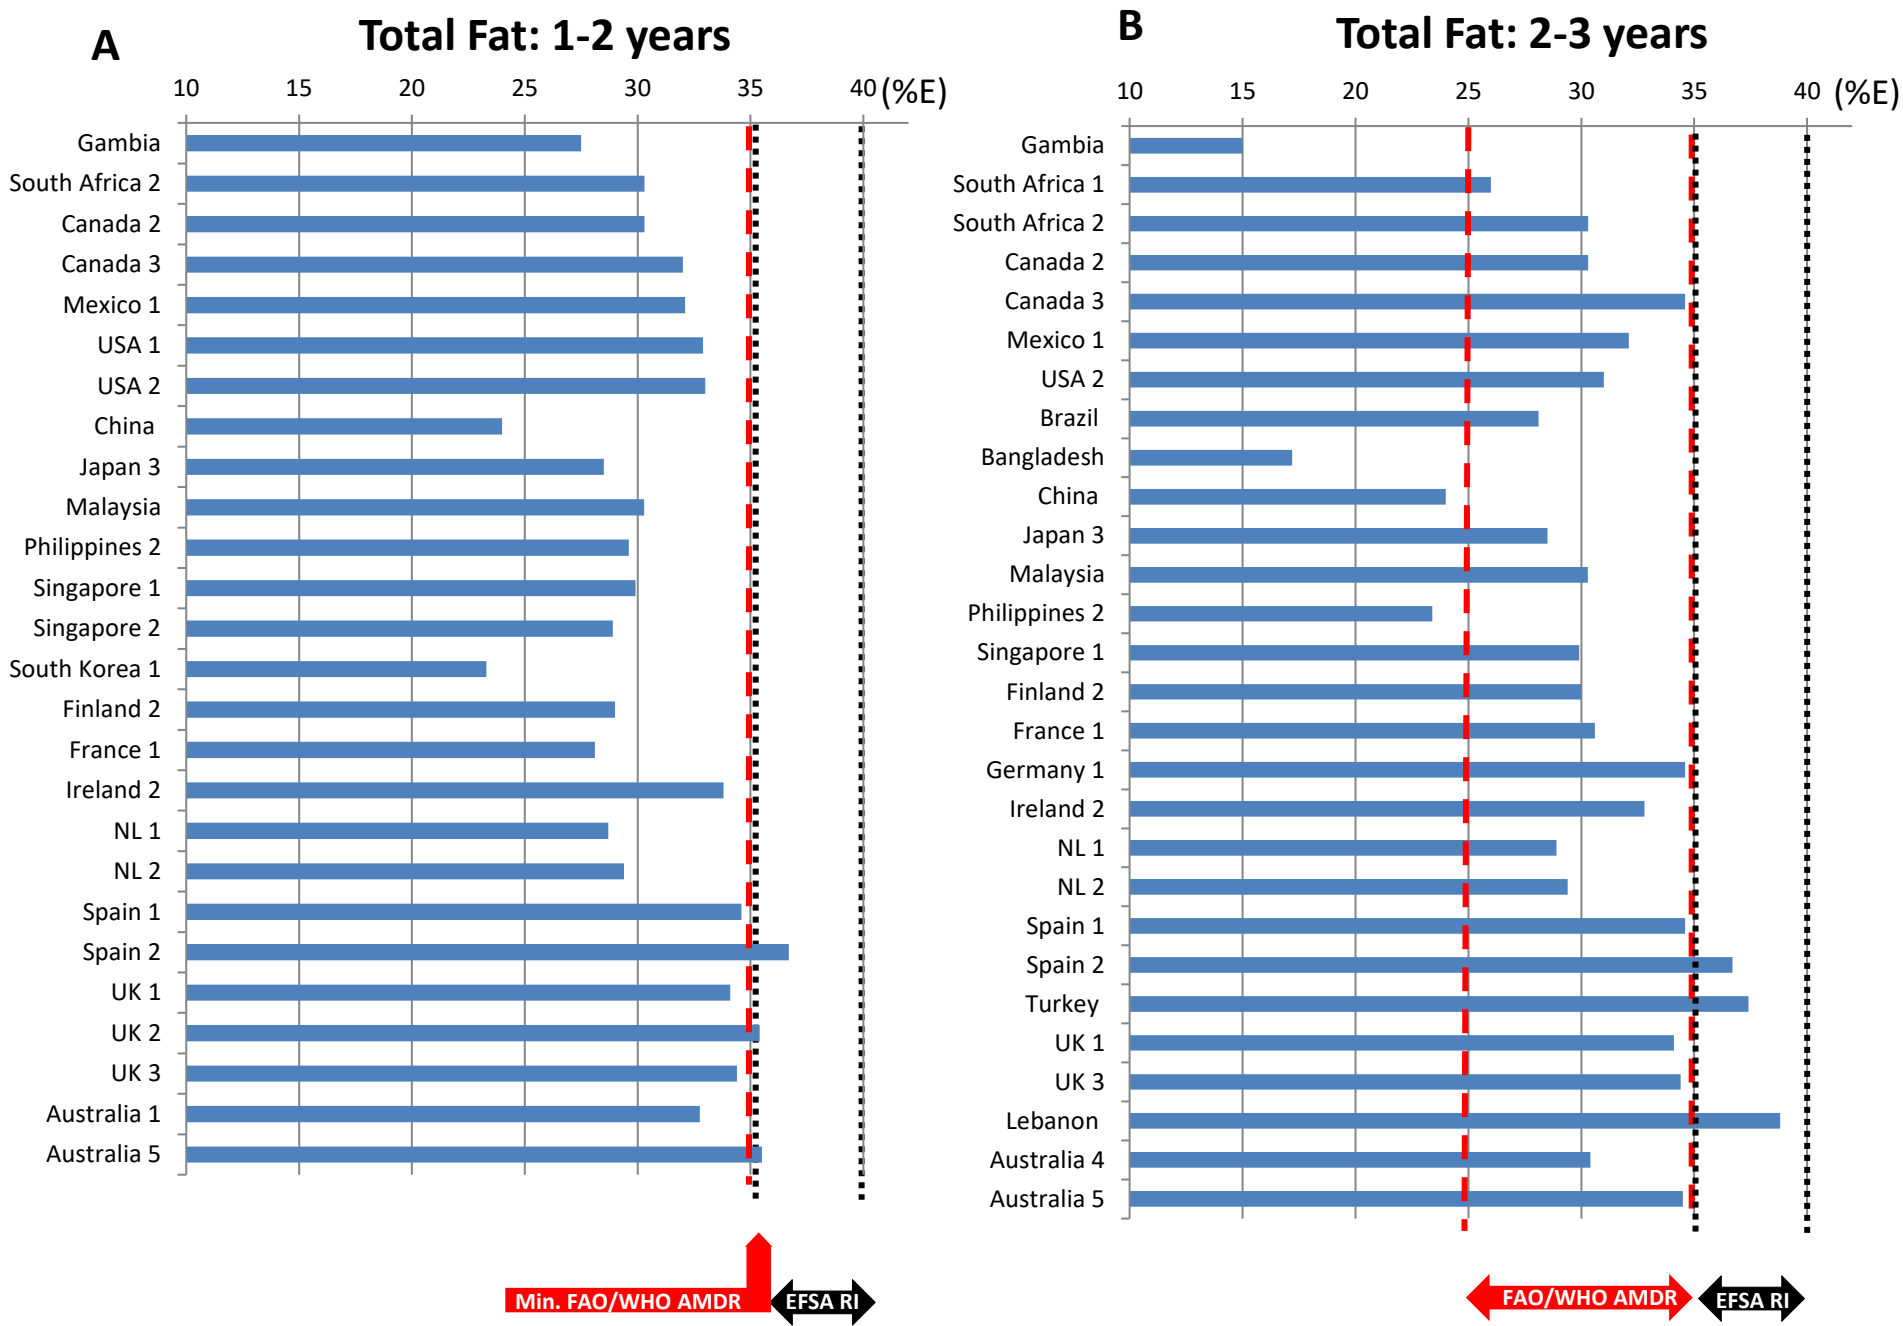

Figure S1

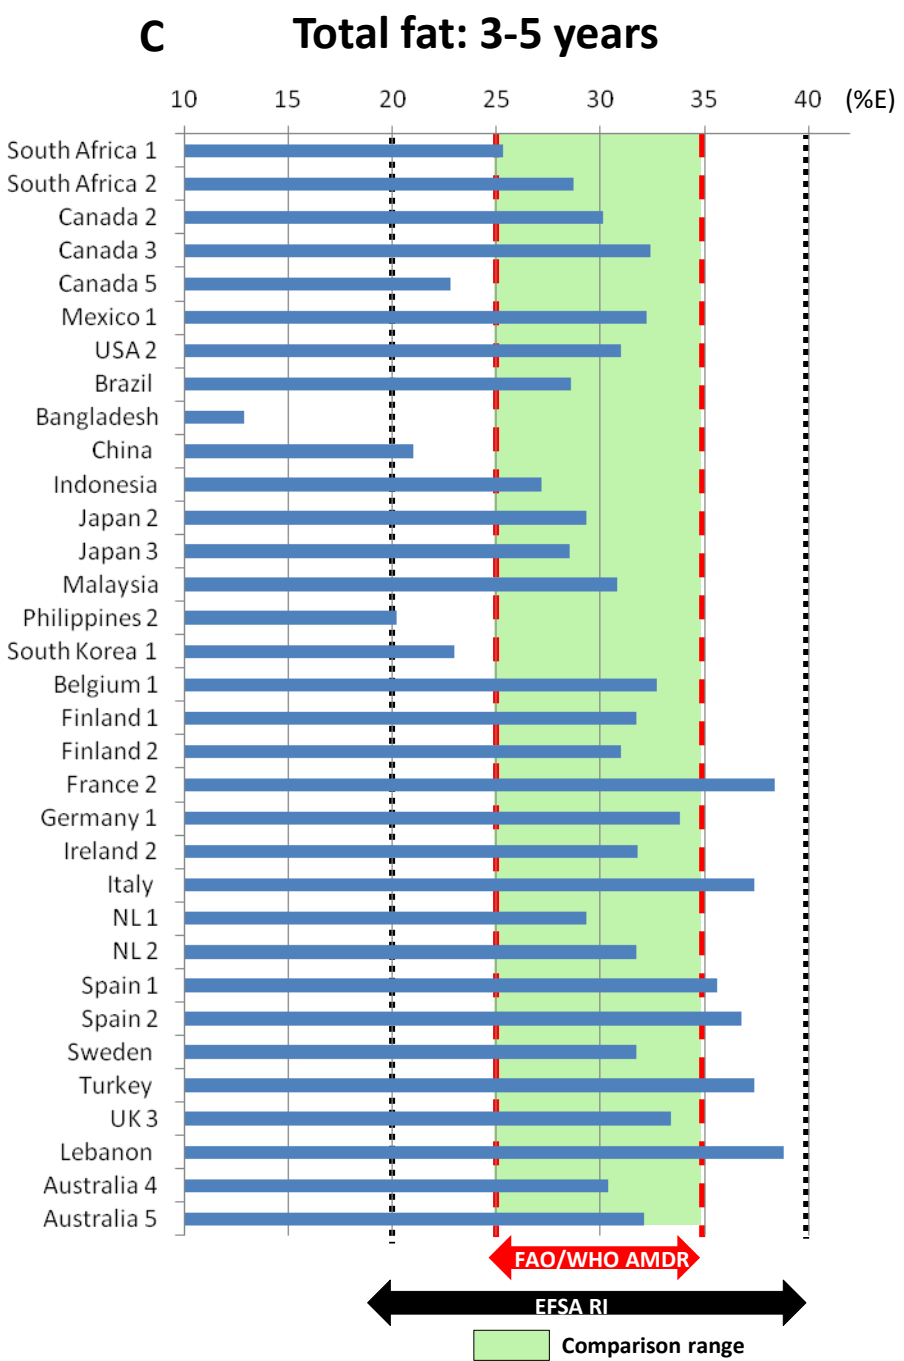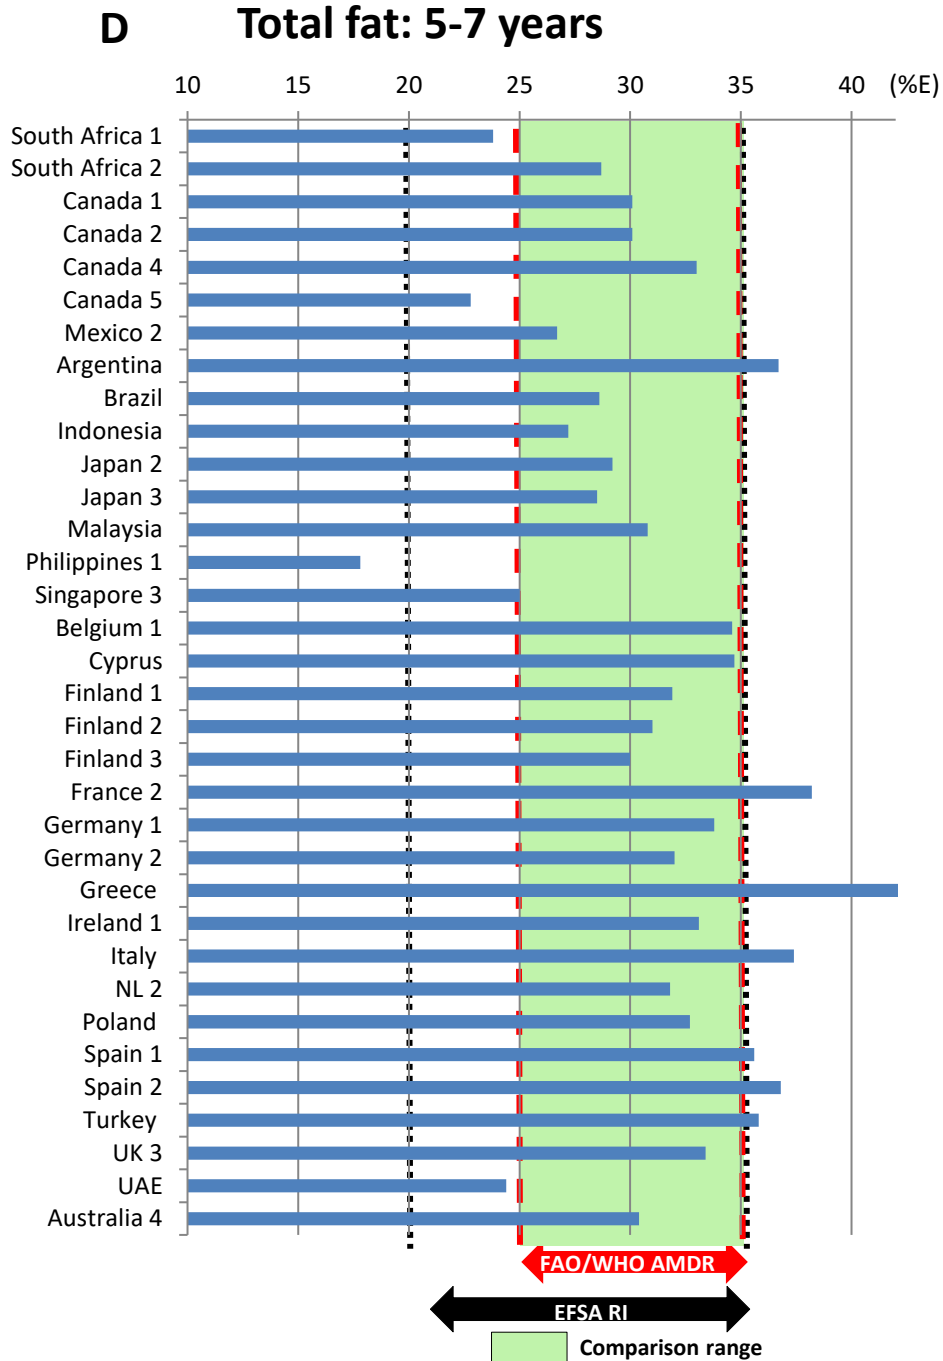

Figure S2

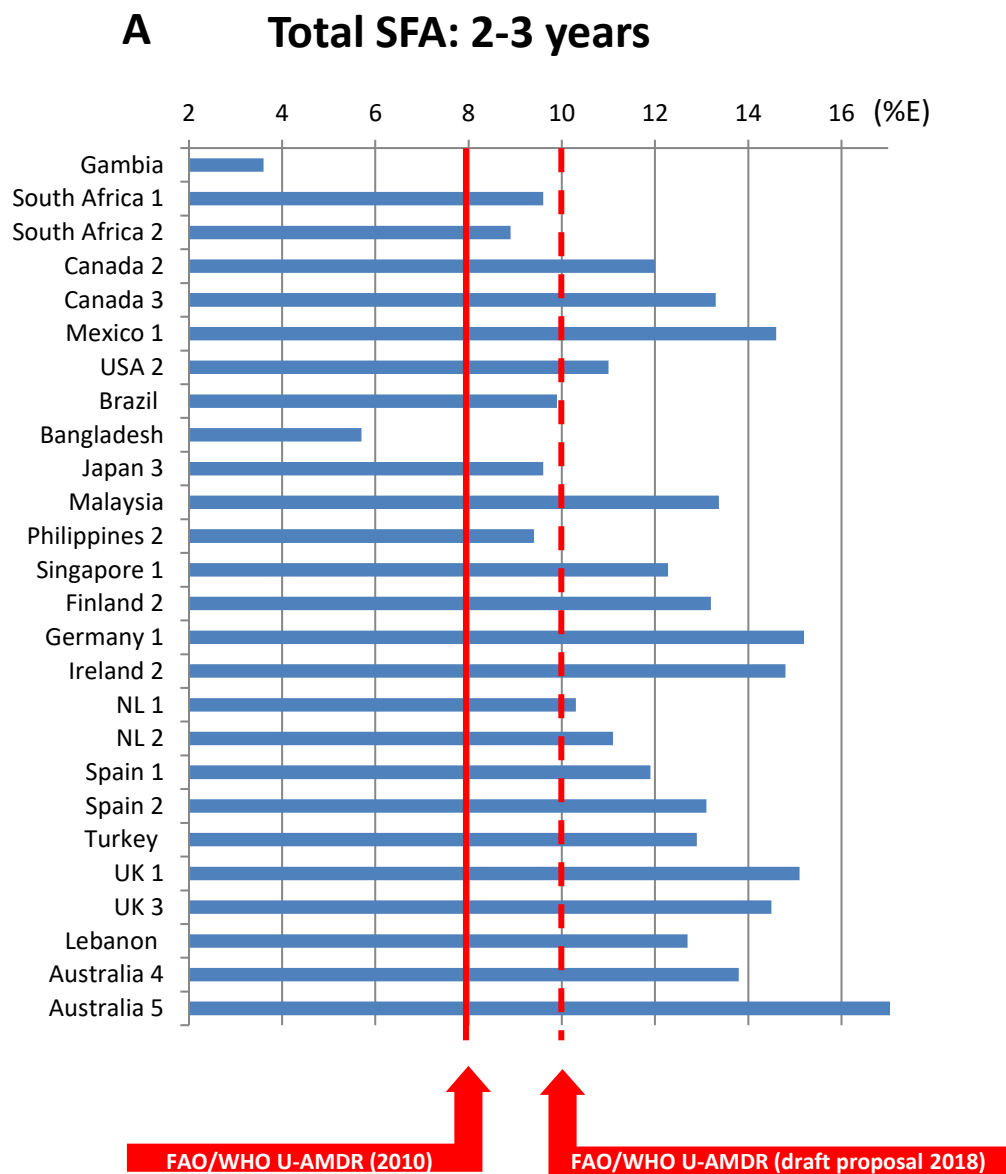

**Figure S2**

**B** **Total SFA: 3-5 years**

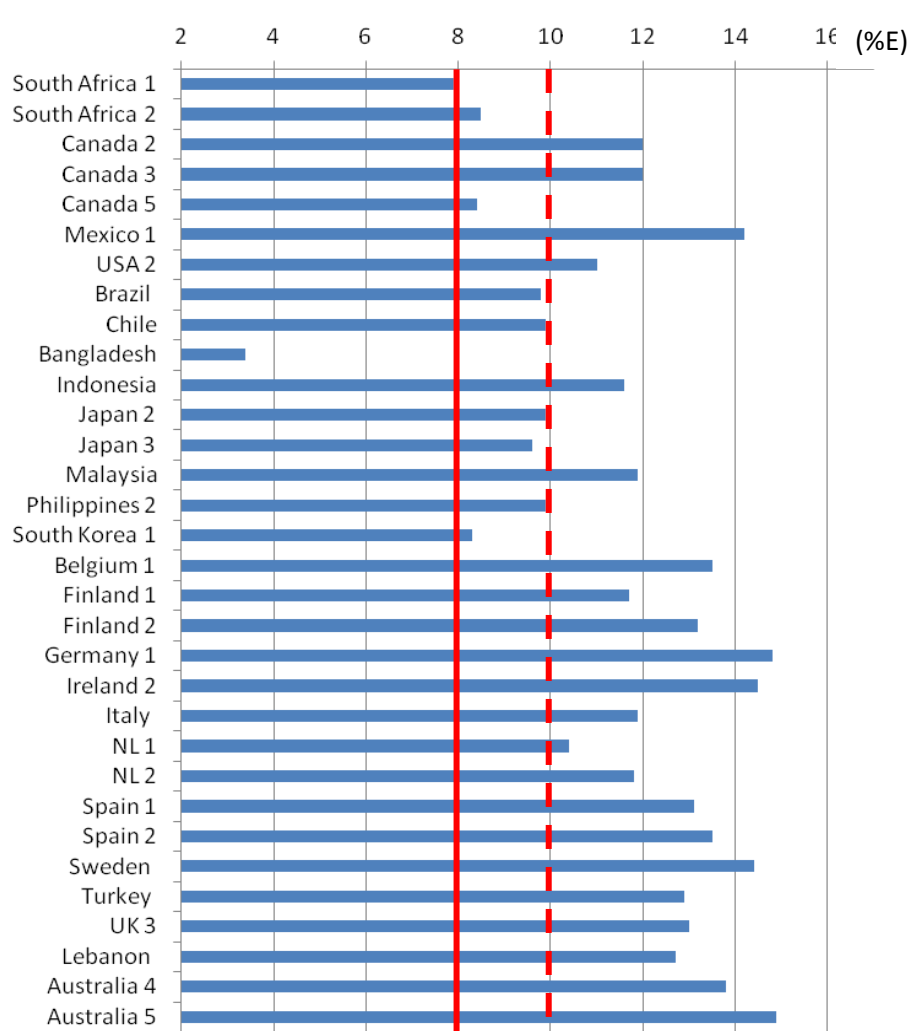

**C** **Total SFA: 5-7 years**

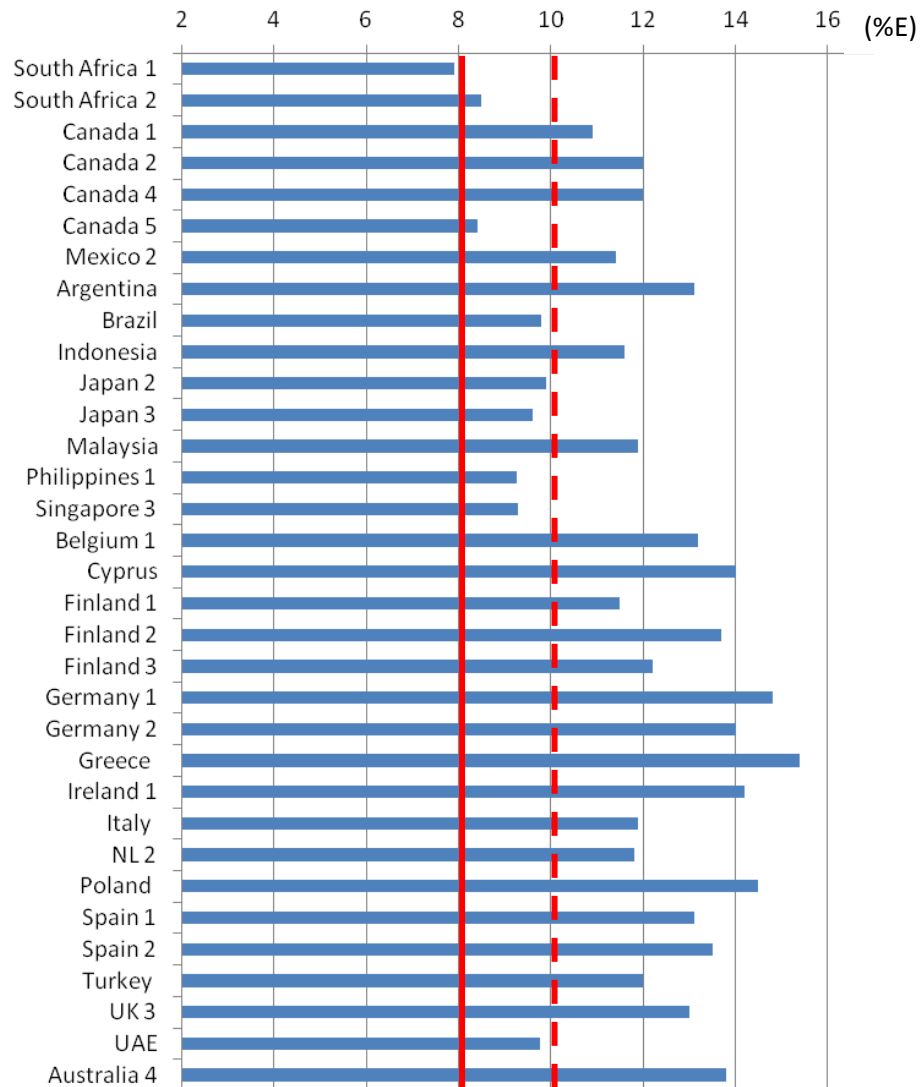

FAO/WHO U-AMDR (2010)

FAO/WHO U-AMDR (draft proposal 2018)

FAO/WHO U-AMDR (2010)

FAO/WHO U-AMDR (draft proposal 2018)

Figure S3

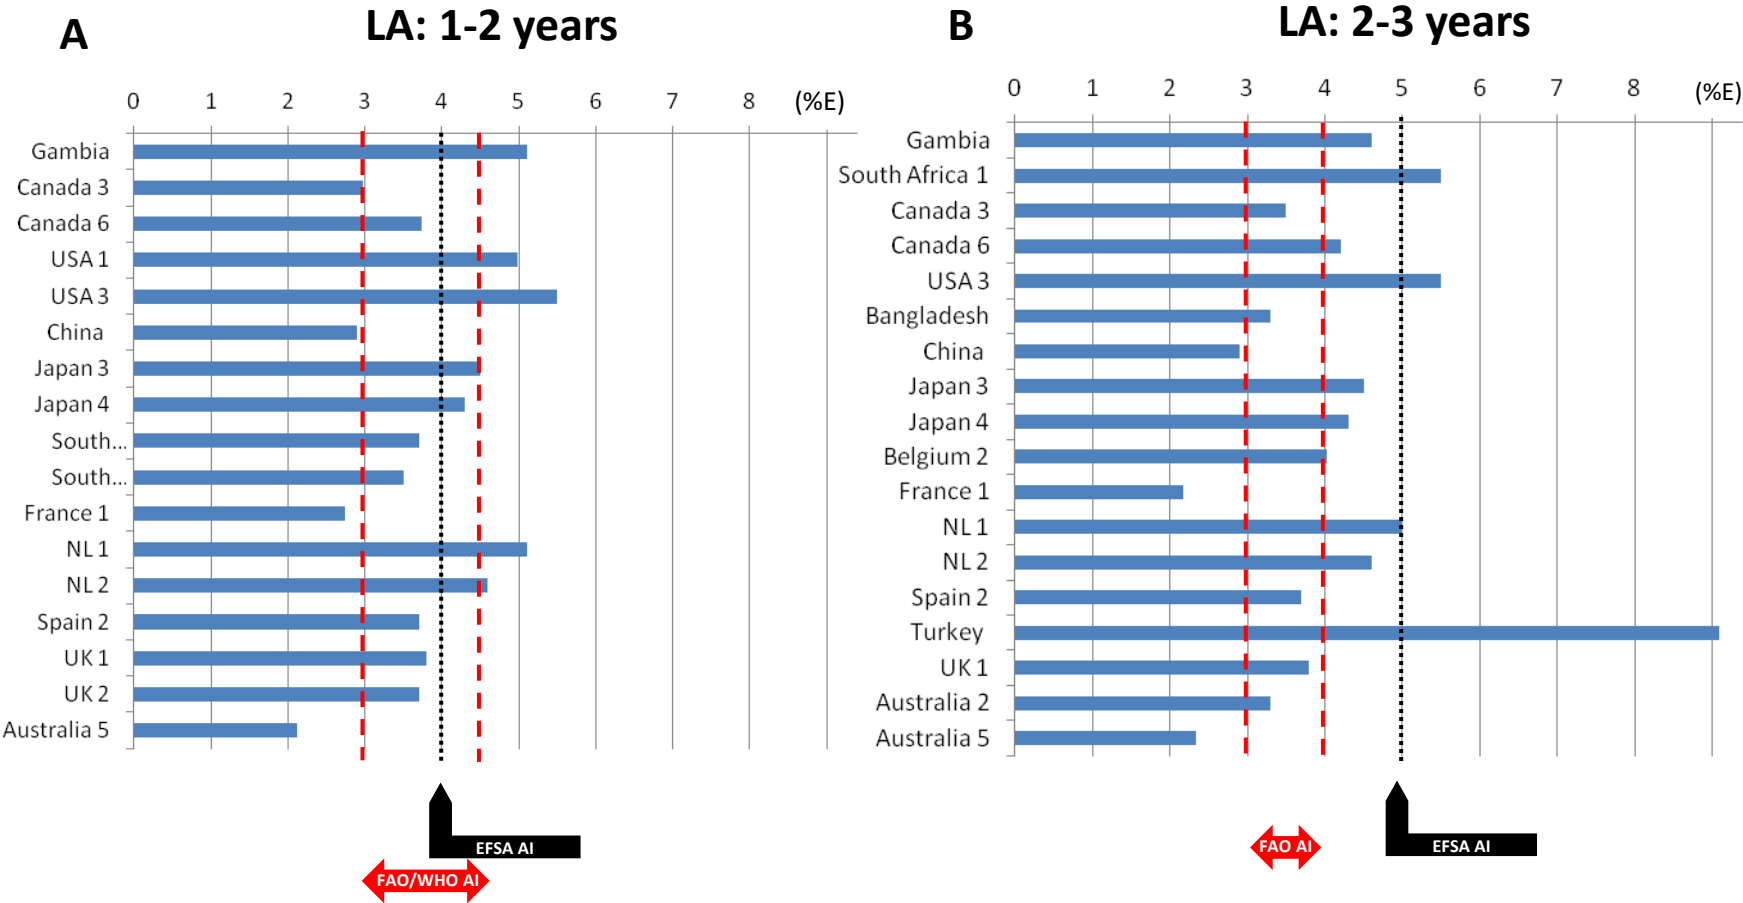

Figure S3

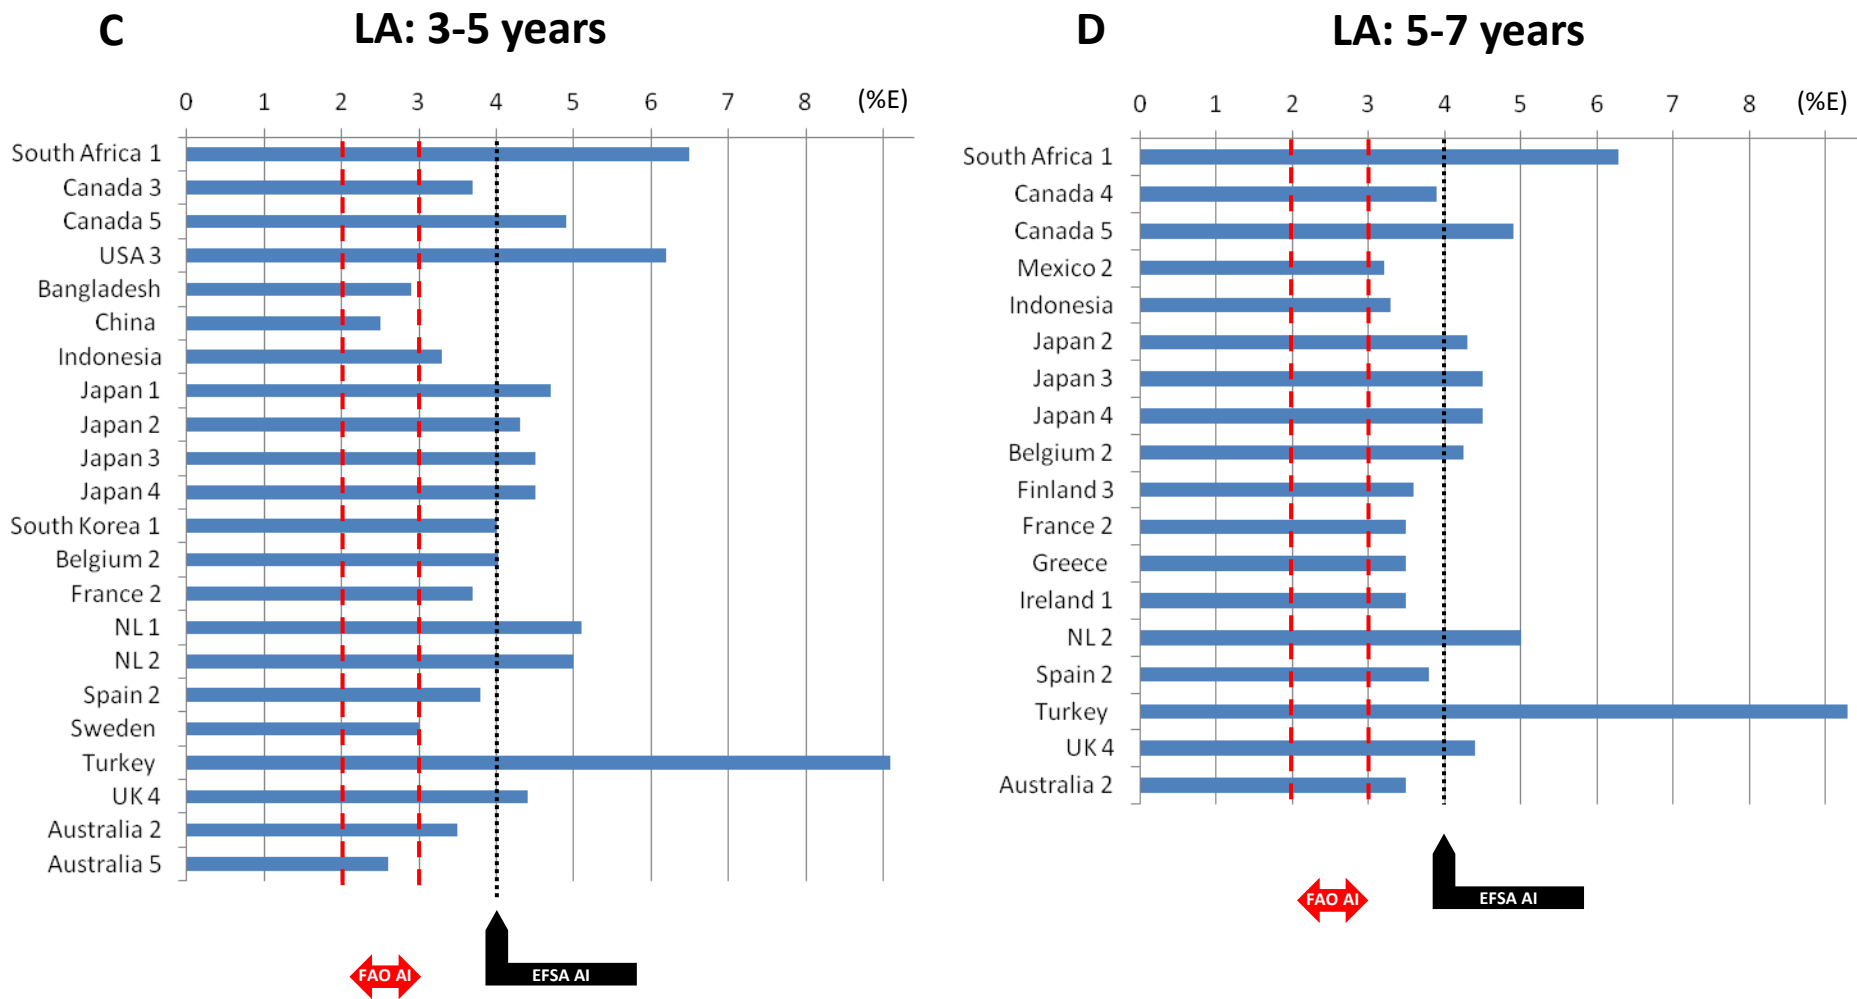

Figure S4

**A** ALA: 1-2 years

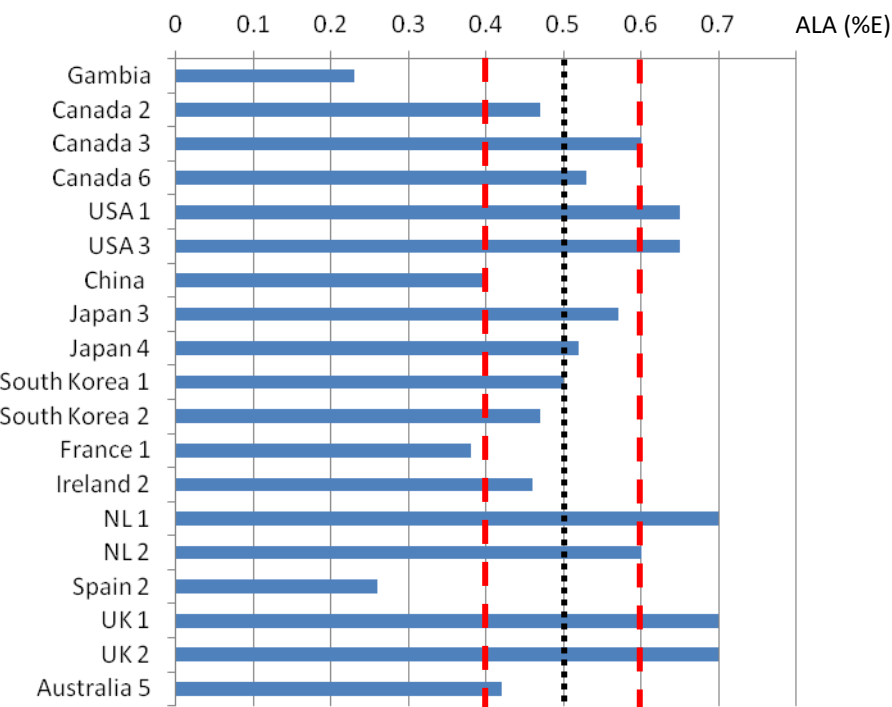

EFSA AI

FAO/WHO AI

**B** ALA: 2-3 years

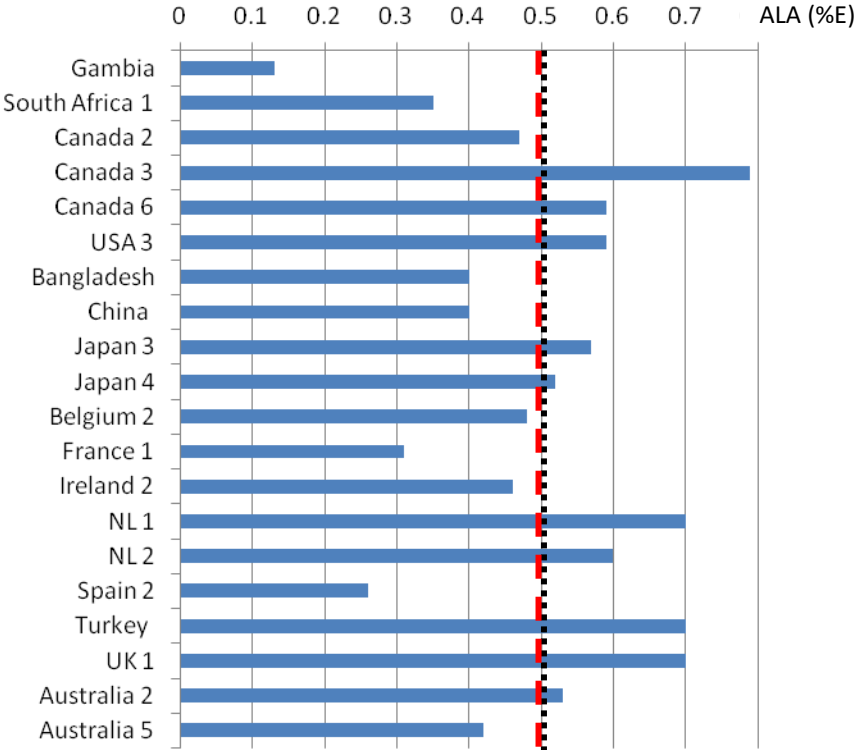

EFSA AI

FAO/WHO AI



**Figure S4**

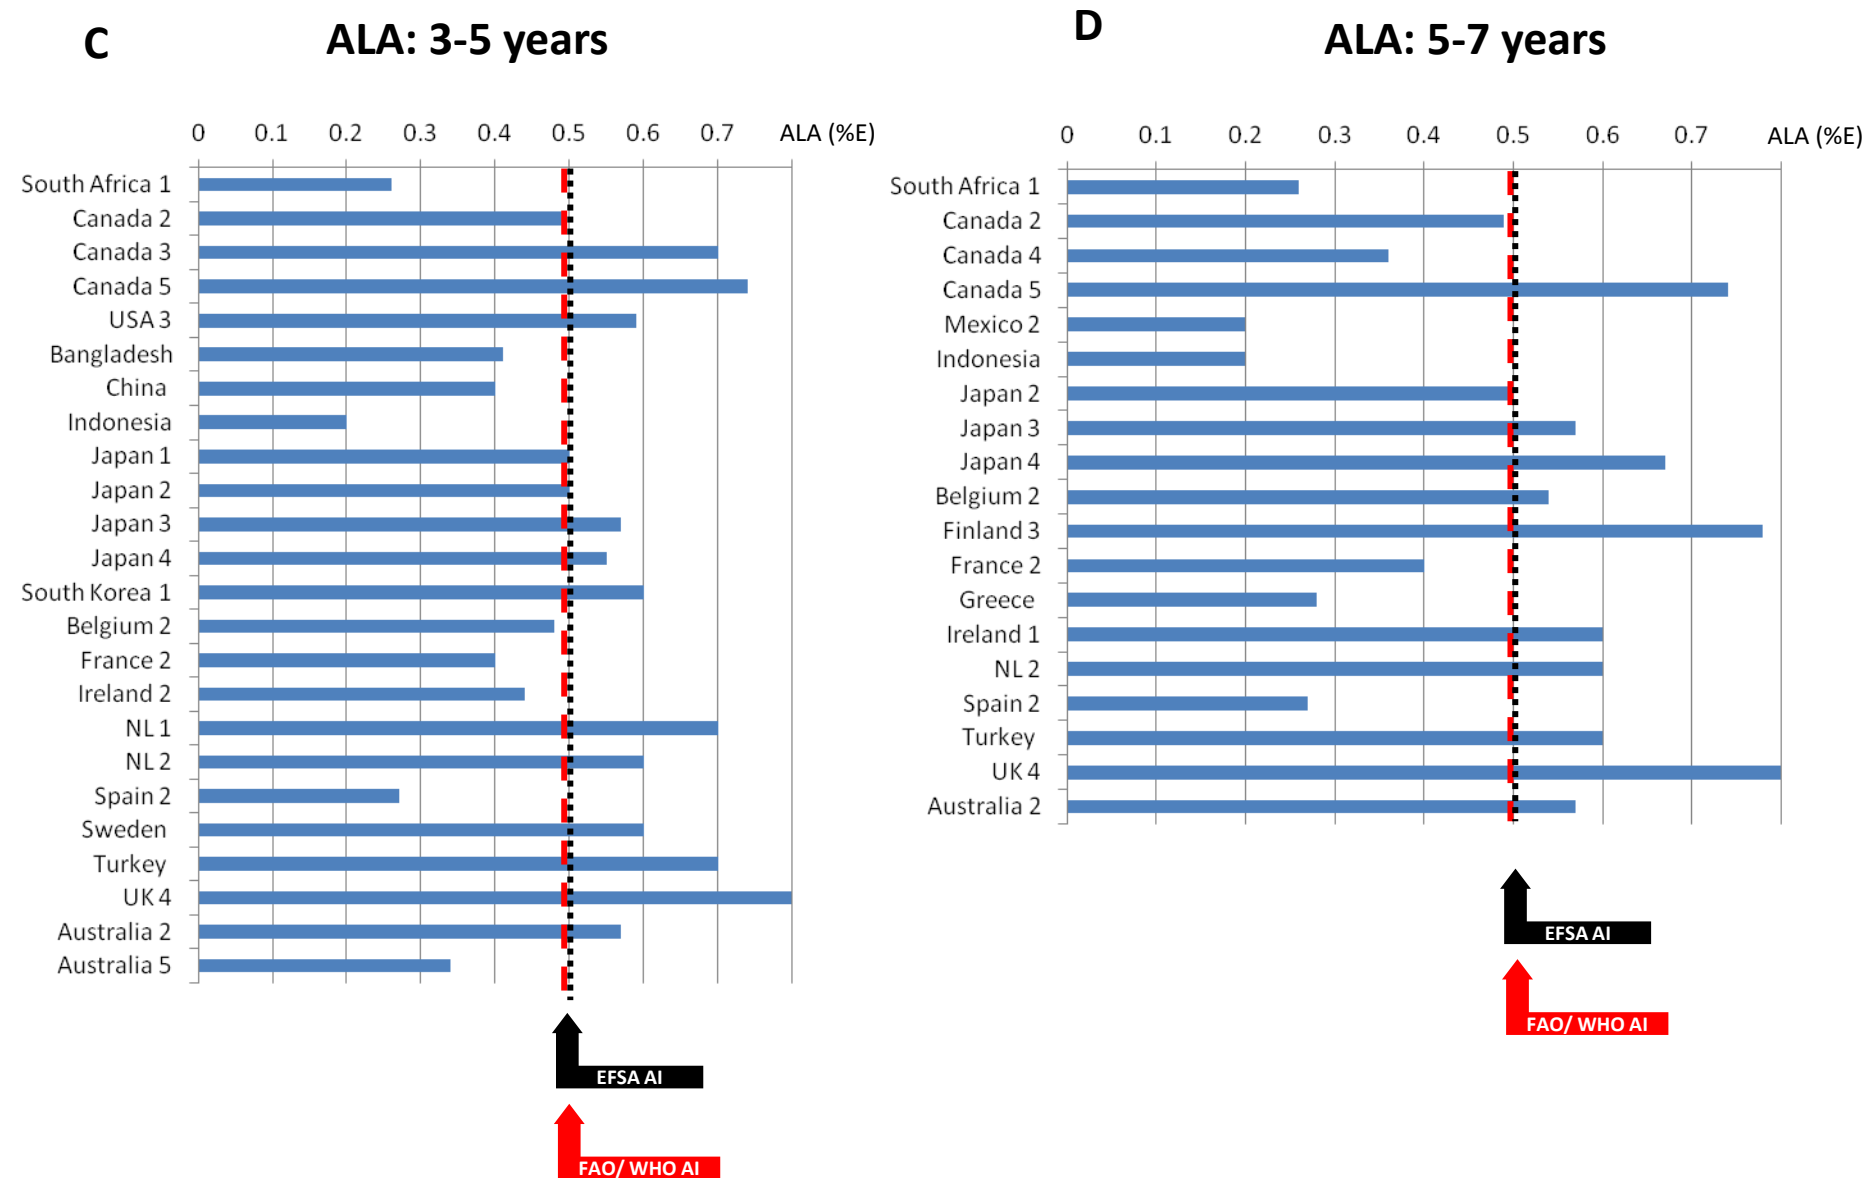

Figure S5

A      DHA (mg/ day): 1-2 years

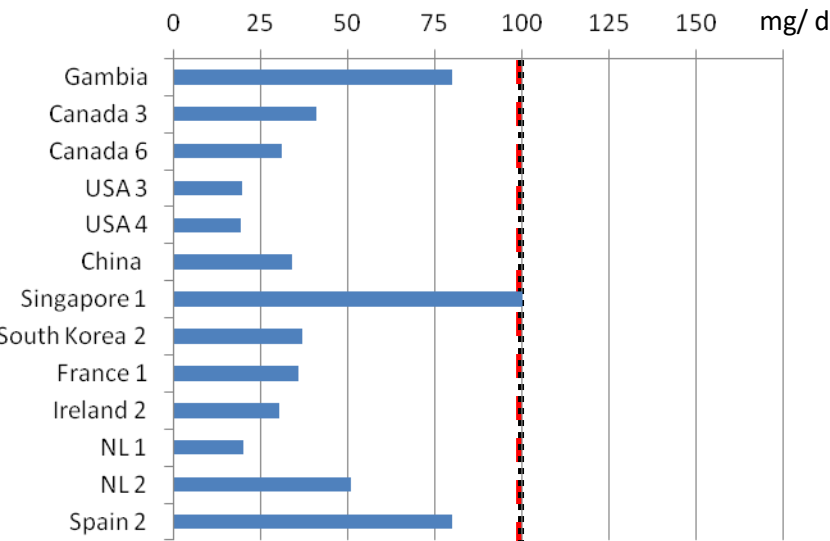

↑  
EFSA AI

↑  
FAO/ WHO AI

B      EPA + DHA (mg/ day): 2-3 years

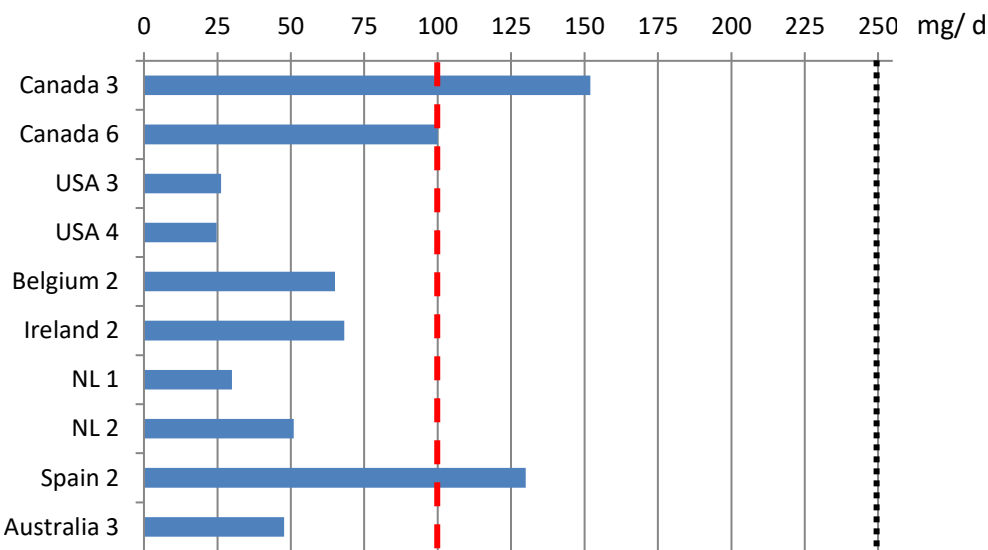

↑  
FAO/ WHO AI

↑  
EFSA AI

**Figure S5**

**C** EPA + DHA (mg/ day): 3-5 years

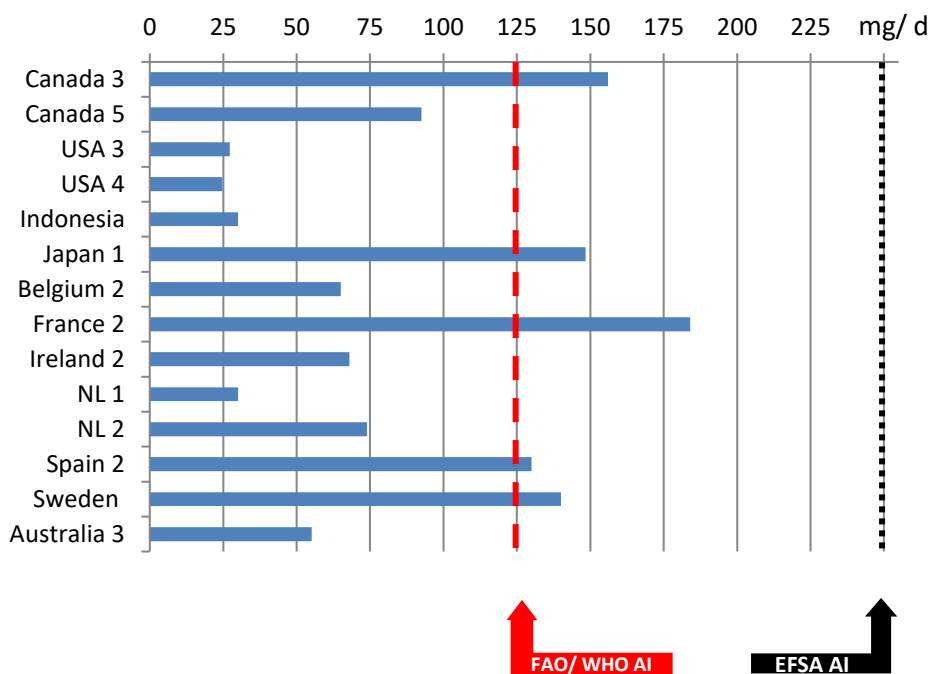

**D** EPA + DHA (mg/ day): 5-7 years

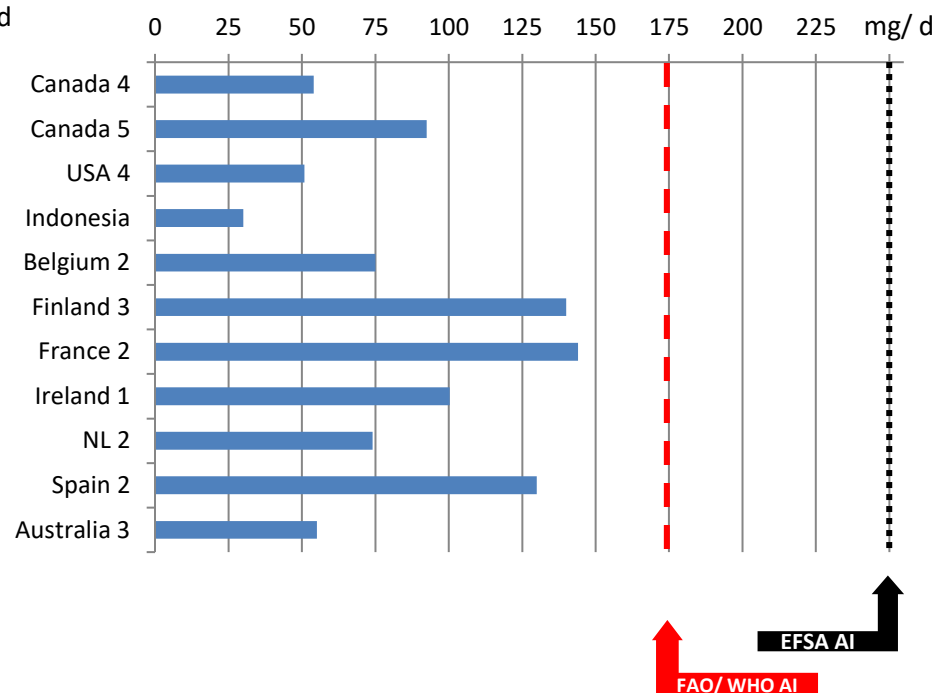

Supplement: s1 [file s1]
