# Supplementary material for: Total Fat and Fatty Acid Intake among 1–7-Year-Old Children from 33 Countries: Comparison with International Recommendations
Source: MDPI journal article supplement (doi:10.3390/nu13103547), 2021-10-09
Supplement: s1 [file s1]

# Supplementary tables

**Table S1** Objective and representativeness of the included studies\*

| <i>Country</i>        | <i>Reference</i>     | <i>Study objective</i>                                                  | <i>Local*<br/>observation<br/>study</i> | <i>Other type of<br/>local* study</i>                                             | <i>Sub-national**<br/>observation<br/>study</i> | <i>National<br/>survey or<br/>nationwide</i> |
|-----------------------|----------------------|-------------------------------------------------------------------------|-----------------------------------------|-----------------------------------------------------------------------------------|-------------------------------------------------|----------------------------------------------|
| <i>Gambia</i>         | Prentice 2000        | Fat and energy needs of children in developing countries                | Rural                                   |                                                                                   |                                                 |                                              |
| <i>South Africa 1</i> | Dannhauser 2000      | Nutritional status of preschool children in informal settlements        |                                         | Baseline data of local intervention study (urban, stratified population sampling) |                                                 |                                              |
| <i>South Africa 2</i> | Steyn 2020           | Energy and macronutrient intake in children                             |                                         |                                                                                   | Urban, stratified population sampling           |                                              |
| <i>Canada 1</i>       | Barr 2018            | Contribution of breakfast to nutrient and food groups intake (all ages) |                                         |                                                                                   |                                                 | x                                            |
| <i>Canada 2</i>       | Health Canada 2012   | Nutrient requirements satisfaction from foods (all ages)                |                                         |                                                                                   |                                                 | x                                            |
| <i>Canada 3</i>       | Innis 2004           | DHA and DPA n-6 PUFA intake vs. status in preschool children            | Urban, day care or preschool centers    |                                                                                   |                                                 |                                              |
| <i>Canada 4</i>       | Lien 2009            | DHA and ARA intake in children                                          | X                                       |                                                                                   |                                                 |                                              |
| <i>Canada 5</i>       | Madden 2009          | N-3 PUFA intake in children (chemical analysis)                         | X                                       |                                                                                   |                                                 |                                              |
| <i>Canada 6</i>       | Wiedeman 2019        | N-6 and n-3 PUFA intake vs. status in toddlers (longitudinal RCT)       |                                         | Dietary intake data from a RCT (urban, local)                                     |                                                 |                                              |
| <i>Mexico 1</i>       | Jimenez-Aguilar 2018 | Energy and nutrient intake vs. recommendations in preschool children    |                                         |                                                                                   |                                                 | x                                            |
| <i>Mexico 2</i>       | Ramirez-Silva        | FA intake in the population                                             |                                         |                                                                                   |                                                 | x                                            |
| <i>USA 1</i>          | Ahluwalia 2016       | Nutrients intake vs. recommendations in children                        |                                         |                                                                                   |                                                 | x                                            |
| <i>USA 2</i>          | Bailey 2018          | Nutrient intake in children                                             |                                         |                                                                                   |                                                 | x                                            |
| <i>USA 3</i>          | Keim 2015            | PUFA and fish intake in children                                        |                                         |                                                                                   |                                                 | x                                            |
| <i>USA 4</i>          | Thomson 2019         | N-3 PUFA intake all ages                                                |                                         |                                                                                   |                                                 | x                                            |
| <i>Argentina</i>      | Cuesta 2018          | Nutrient intake and obesity in children and adolescents                 | Urban, stratified population sampling   |                                                                                   |                                                 |                                              |

| <i>Country</i>       | <i>Reference</i>       | <i>Study objective</i>                                                           | <i>Local*<br/>observation<br/>study</i> | <i>Other type of<br/>local* study</i> | <i>Sub-national**<br/>observation<br/>study</i> | <i>National<br/>survey or<br/>nationwide</i> |
|----------------------|------------------------|----------------------------------------------------------------------------------|-----------------------------------------|---------------------------------------|-------------------------------------------------|----------------------------------------------|
| <b>Brazil</b>        | Bueno 2013             | Nutrient risk in children                                                        |                                         |                                       | Day care centers and schools                    |                                              |
| <b>Chile</b>         | Rebolledo 2019         | Dietary intake by food source in children and adolescents vs. family income      | Urban, preschool                        |                                       |                                                 |                                              |
| <b>Bangladesh</b>    | Yakes 2011             | PUFA intake adequacy vs. Breastfeeding in children                               | Rural, random sampling                  |                                       |                                                 |                                              |
| <b>China</b>         | Barbarich 2006         | FA + macronutrient intake, vs. anthropometry in rural children                   | Rural                                   |                                       |                                                 |                                              |
| <b>Indonesia</b>     | Neufingerl 2016        | FA intake in children                                                            |                                         |                                       |                                                 | x                                            |
| <b>Japan 1</b>       | Ando 2019              | EPA + DHA intake vs. status in preschool children                                | Urban                                   |                                       |                                                 |                                              |
| <b>Japan 2</b>       | Murakami 2018b         | Nutrient intake adequacy in children attending nursery                           |                                         |                                       |                                                 | x                                            |
| <b>Japan 3</b>       | NHNS-J 2018            | Nutrient intake, all population                                                  |                                         |                                       |                                                 | x                                            |
| <b>Japan 4</b>       | Tsuboyama-Kasaoka 2013 | Representativity of 2 y measures of nutrient intake (all ages)                   |                                         |                                       |                                                 | x                                            |
| <b>Malaysia</b>      | Mohd Shariff 2015      | Energy, nutrients, food groups intake vs. family income in urban children        |                                         |                                       | Urban, child care centers and kindergarten      |                                              |
| <b>Philippines 1</b> | Angeles-Agdeppa 2019   | Nutrient and food group intake adequacy in schoolchildren                        |                                         |                                       |                                                 | x                                            |
| <b>Philippines 2</b> | Denney 2018            | Nutrient and food group intake adequacy in young children                        |                                         |                                       |                                                 | x                                            |
| <b>Singapore 1</b>   | Allan 2017             | Validation of FFQ in children 15-36 months                                       | Urban, day care centers                 |                                       |                                                 |                                              |
| <b>Singapore 2</b>   | Lim 2019               | Validation of FFQ in toddlers 18 months                                          | Urban, volunteers                       |                                       |                                                 |                                              |
| <b>Singapore 3</b>   | Sugianto 2019          | Validation of FFQ in 5y old children                                             | Urban, volunteers                       |                                       |                                                 |                                              |
| <b>South Korea 1</b> | Baek 2018              | Fat and FA intake in children                                                    |                                         |                                       |                                                 | x                                            |
| <b>South Korea 2</b> | Kim 2019               | N-6 and n-3 PUFA intake vs. recommendations in children                          |                                         |                                       |                                                 | x                                            |
| <b>Belgium 1</b>     | De Ridder 2015         | National Survey report                                                           |                                         |                                       |                                                 | x                                            |
| <b>Belgium 2</b>     | Sioen 2007             | N-6 and n-3 PUFA intake in children                                              |                                         |                                       | Random sampling                                 |                                              |
| <b>Cyprus</b>        | Tornaritis 2014        | Nutrient intake vs. body weight and mother education in children and adolescents |                                         |                                       |                                                 | x                                            |

| <i>Country</i>       | <i>Reference</i>        | <i>Study objective</i>                                                          | <i>Local*<br/>observation<br/>study</i>          | <i>Other type of<br/>local* study</i>                         | <i>Sub-national**<br/>observation<br/>study</i> | <i>National<br/>survey or<br/>nationwide</i> |
|----------------------|-------------------------|---------------------------------------------------------------------------------|--------------------------------------------------|---------------------------------------------------------------|-------------------------------------------------|----------------------------------------------|
| <i>Finland 1</i>     | Korkalo 2019            | Contribution of meals at preschool on total dietary intake                      |                                                  |                                                               | x                                               |                                              |
| <i>Finland 2</i>     | Kyttala 2008            | Nutrient intake and food consumption in children                                |                                                  |                                                               | x                                               |                                              |
| <i>Finland 3</i>     | Naveed 2020             | FA intake vs. cognition in children                                             |                                                  | Baseline data of local intervention study (urban, volunteers) |                                                 |                                              |
| <i>France 1</i>      | Chouraqui 2020          | Nutritional intake vs. recommendations in children                              |                                                  |                                                               |                                                 | x                                            |
| <i>France 2</i>      | Guesnet 2018            | PUFA intake in children and adolescents                                         |                                                  |                                                               |                                                 | x                                            |
| <i>Germany 1</i>     | Libuda 2014             | Fat intake in children and adolescents (time trend, longitudinal study)         | X                                                |                                                               |                                                 |                                              |
| <i>Germany 2</i>     | Stahl 2009              | Nutrient and food intake in children and adolescents (time trend)               |                                                  |                                                               |                                                 | x                                            |
| <i>Greece</i>        | Smpokos 2014            | Energy and nutrient intake in children (time trend, 2 cohorts)                  |                                                  |                                                               | Stratified sampling                             |                                              |
| <i>Ireland 1</i>     | O'Connor 2020           | Fat intake in children, time trend                                              |                                                  |                                                               |                                                 | x                                            |
| <i>Ireland 2</i>     | Walton 2017             | Nutrient intake vs. recommendations in children                                 |                                                  |                                                               |                                                 | x                                            |
| <i>Italy</i>         | Sette 2011              | Nutrient intake, all population                                                 |                                                  |                                                               |                                                 | x                                            |
| <i>Netherlands 1</i> | Goldbohm 2016           | Nutrient and food intake in children going to day care centers                  |                                                  |                                                               |                                                 | x                                            |
| <i>Netherlands 2</i> | Van Rossum 2020         | National Survey Report                                                          |                                                  |                                                               |                                                 | x                                            |
| <i>Poland</i>        | Merkel 2014             | Energy and macronutrient intake in children                                     | Preschool members of the Health promotion league |                                                               |                                                 |                                              |
| <i>Spain 1</i>       | Lopez-Sobaler 2019      | Macronutrient intake vs. recommendations in children and adolescents            |                                                  |                                                               |                                                 | x                                            |
| <i>Spain 2</i>       | Madrigal 2020           | Fat and FA intake vs. recommendations (vs. family factors) in children          |                                                  |                                                               | Urban, stratified sampling                      |                                              |
| <i>Sweden</i>        | Enghardt Barbieri, 2003 | National Survey Report                                                          |                                                  |                                                               |                                                 | x                                            |
| <i>Turkey</i>        | Rippin 2018             | National Survey Report (in a review on children and adolescent nutrient intake) |                                                  |                                                               |                                                 | x                                            |

| <i>Country</i>     | <i>Reference</i> | <i>Study objective</i>                                                 | <i>Local*<br/>observation<br/>study</i> | <i>Other type of<br/>local* study</i>   | <i>Sub-national**<br/>observation<br/>study</i> | <i>National<br/>survey or<br/>nationwide</i> |
|--------------------|------------------|------------------------------------------------------------------------|-----------------------------------------|-----------------------------------------|-------------------------------------------------|----------------------------------------------|
| <b>UK 1</b>        | Gibson 2014a     | Nutrient intake vs. recommendations in children                        |                                         |                                         |                                                 | x                                            |
| <b>UK 2</b>        | Gibson 2014b     | Nutrient intake vs. recommendations in children                        |                                         |                                         |                                                 | x                                            |
| <b>UK 3</b>        | NDNS             | National Survey Report                                                 |                                         |                                         |                                                 | x                                            |
| <b>UK 4</b>        | SACN 2019        | Health Agency Report                                                   |                                         |                                         |                                                 | x                                            |
| <b>Lebanon</b>     | Nasreddine 2018  | Nutrient intake vs. status in children (Review using National Surveys) |                                         |                                         |                                                 | x                                            |
| <b>UAE</b>         | Ali 2013         | Nutrient Intake vs. recommendations in children and adolescents        |                                         |                                         |                                                 | x                                            |
| <b>Australia 1</b> | Lioret 2013      | Nutrient and food intake in children                                   |                                         | Control arm of a RCT, urban, volunteers |                                                 |                                              |
| <b>Australia 2</b> | Meyer 2011       | N-3 PUFA intake vs. recommendations in children and adolescents        |                                         |                                         |                                                 | x                                            |
| <b>Australia 3</b> | Rahmawaty 2013   | EPA, DPA, DHA intake and food sources in children and adolescents      |                                         |                                         |                                                 | x                                            |
| <b>Australia 4</b> | Rangan 2014      | Misreporting of energy intake and adolescents                          |                                         |                                         |                                                 | x                                            |
| <b>Australia 5</b> | Zhou 2012        | Nutrient intake and status in children                                 | Urban, stratified random sampling       |                                         |                                                 |                                              |
|                    |                  |                                                                        | <b>N=15</b>                             | <b>N=4</b>                              | <b>N= 8</b>                                     | <b>N=38</b>                                  |

Abbreviations: DHA: docosahexaenoic acid; DPA : docosapentaenoic acid (22 :5 n-3) ; EPA: eicosapentaenoic acid; FA: fatty acid; PUFA: polyunsaturated fatty acids; RCT : randomized controlled study

\*Sorted by alphabetical order of continent, country and author. \*\*Local: one or several villages or informal settlements, or one town. \*\*\*Sub-national: several towns or one county or state or country region.

**Table S2** Dietary assessment methods used in the included studies\*

| <i>Country</i>        | <i>Reference</i>   | <i>Dietary Recall</i> | <i>Dietary Record</i>     | <i>Weighed or semi-weighed Dietary Records</i> | <i>Food Frequency Questionnaire</i> | <i>Other method or method combination</i> |
|-----------------------|--------------------|-----------------------|---------------------------|------------------------------------------------|-------------------------------------|-------------------------------------------|
| <b>Gambia</b>         | Prentice 2000      |                       | >1d (#days not specified) |                                                |                                     |                                           |
| <b>South Africa 1</b> | Dannhauser 2000    | 24HR                  |                           |                                                |                                     |                                           |
| <b>South Africa 2</b> | Steyn 2020         | 24HR + 2x(24HR)       |                           |                                                |                                     |                                           |
| <b>Canada 1</b>       | Barr 2018          | 24HR                  |                           |                                                |                                     |                                           |
| <b>Canada 2</b>       | Health Canada 2012 | 24HR                  |                           |                                                |                                     |                                           |

| <i>Country</i>       | <i>Reference</i>       | <i>Dietary Recall</i> | <i>Dietary Record</i> | <i>Weighed or semi-weighed Dietary Records</i> | <i>Food Frequency Questionnaire</i> | <i>Other method or method combination</i>                      |
|----------------------|------------------------|-----------------------|-----------------------|------------------------------------------------|-------------------------------------|----------------------------------------------------------------|
| <i>Canada 3</i>      | Innis 2004             |                       |                       |                                                | FFQ (#days not specified)           |                                                                |
| <i>Canada 4</i>      | Lien 2009              |                       |                       |                                                |                                     | 3d record + FFQ for fish intake                                |
| <i>Canada 5</i>      | Madden 2009            |                       |                       |                                                |                                     | Other: 3d weighed collection and chemical analysis of all food |
| <i>Canada 6</i>      | Wiedeman 2019          |                       | 3 d                   |                                                |                                     |                                                                |
| <i>Mexico 1</i>      | Jimenez-Aguilar 2018   |                       |                       |                                                | 7 d semi-quantitative               |                                                                |
| <i>Mexico 2</i>      | Ramirez-Silva          |                       |                       |                                                | 7 d                                 |                                                                |
| <i>USA 1</i>         | Ahluwalia 2016         | 2x 24HR               |                       |                                                |                                     |                                                                |
| <i>USA 2</i>         | Bailey 2018            | 24HR + 1x (24HR)      |                       |                                                |                                     |                                                                |
| <i>USA 3</i>         | Keim 2015              |                       |                       |                                                |                                     | 24HR + 30d FFQ for fish intake                                 |
| <i>USA 4</i>         | Thomson 2019           |                       |                       |                                                |                                     | 2x 24HR + 30d FFQ for fish intake                              |
| <i>Argentina</i>     | Cuesta 2018            | 24HR                  |                       |                                                |                                     |                                                                |
| <i>Brazil</i>        | Bueno 2013             |                       |                       |                                                |                                     | 1d WR (day care center) + food form (home) + 1x (1d WR + form) |
| <i>Chile</i>         | Rebolledo 2019         | 24HR + 1x (24HR)      |                       |                                                |                                     |                                                                |
| <i>Bangladesh</i>    | Yakes 2011             |                       |                       | 2d sWR + correction                            |                                     |                                                                |
| <i>China</i>         | Barbarich 2006         | 3x24HR                |                       |                                                |                                     |                                                                |
| <i>Indonesia</i>     | Neufingerl 2016        | 24HR                  |                       |                                                |                                     |                                                                |
| <i>Japan 1</i>       | Ando 2019              |                       |                       |                                                | 1 month                             |                                                                |
| <i>Japan 2</i>       | Murakami 2018b         |                       | 3 d + correction      |                                                |                                     |                                                                |
| <i>Japan 3</i>       | NHNS-J 2018            |                       |                       | 1d household WR                                |                                     |                                                                |
| <i>Japan 4</i>       | Tsuboyama-Kasaoka 2013 |                       |                       | 1d household sWR                               |                                     |                                                                |
| <i>Malaysia</i>      | Mohd Shariff 2015      |                       |                       |                                                |                                     | 24HR + 1x 1d Record                                            |
| <i>Philippines 1</i> | Angeles-Agdeppa 2019   | 24HR + 1x (24HR)      |                       |                                                |                                     |                                                                |
| <i>Philippines 2</i> | Denney 2018            | 24HR + 1x (24HR)      |                       |                                                |                                     |                                                                |
| <i>Singapore 1</i>   | Allan 2017             |                       |                       | 2d WR                                          | 3-month (calibrated)                |                                                                |
| <i>Singapore 2</i>   | Lim 2019               | 24HR + 1x (24HR)      |                       |                                                | 1-month                             |                                                                |
| <i>Singapore 3</i>   | Sugianto 2019          |                       | 3d                    |                                                | 1-month                             |                                                                |

| <i>Country</i>       | <i>Reference</i>        | <i>Dietary Recall</i> | <i>Dietary Record</i>        | <i>Weighed or semi-weighed Dietary Records</i> | <i>Food Frequency Questionnaire</i> | <i>Other method or method combination</i>                          |
|----------------------|-------------------------|-----------------------|------------------------------|------------------------------------------------|-------------------------------------|--------------------------------------------------------------------|
| <i>South Korea 1</i> | Baek 2018               | 24HR                  |                              |                                                |                                     |                                                                    |
| <i>South Korea 2</i> | Kim 2019                | 24HR                  |                              |                                                |                                     |                                                                    |
| <i>Belgium 1</i>     | De Ridder 2015          |                       |                              |                                                |                                     | 2 x 24HR + 12-month FFQ                                            |
| <i>Belgium 2</i>     | Sioen 2007              |                       | 3d                           |                                                |                                     |                                                                    |
| <i>Cyprus</i>        | Tornaritis 2014         |                       | 3 d                          |                                                |                                     |                                                                    |
| <i>Finland 1</i>     | Korkalo 2019            |                       | 3 d + 2d record on subsample |                                                |                                     |                                                                    |
| <i>Finland 2</i>     | Kyttala 2008            |                       | 3 d                          |                                                |                                     |                                                                    |
| <i>Finland 3</i>     | Naveed 2020             |                       | 4 d                          |                                                |                                     |                                                                    |
| <i>France 1</i>      | Chouraiqui 2020         |                       | 3 d                          |                                                |                                     |                                                                    |
| <i>France 2</i>      | Guesnet 2018            |                       | 7d                           |                                                |                                     |                                                                    |
| <i>Germany 1</i>     | Libuda 2014             |                       |                              | 3d WR                                          |                                     |                                                                    |
| <i>Germany 2</i>     | Stahl 2009              |                       |                              | 3 d sWR                                        |                                     |                                                                    |
| <i>Greece</i>        | Smpokos 2014            |                       | 3 d                          |                                                |                                     |                                                                    |
| <i>Ireland 1</i>     | O'Connor 2020           |                       |                              | 4d WR + correction                             |                                     |                                                                    |
| <i>Ireland 2</i>     | Walton 2017             |                       |                              | 4d WR + correction                             |                                     |                                                                    |
| <i>Italy</i>         | Sette 2011              |                       | 3 d                          |                                                |                                     |                                                                    |
| <i>NL 1</i>          | Goldbohm 2016           |                       | 2 d                          |                                                |                                     |                                                                    |
| <i>NL 2</i>          | Van Rossum 2020         |                       |                              |                                                |                                     | 2x24HR combined with food diary + FFQ to assess fish intake        |
| <i>Poland</i>        | Merkel 2014             |                       | 3 d                          |                                                |                                     |                                                                    |
| <i>Spain 1</i>       | Lopez-Sobaler 2019      |                       |                              |                                                |                                     | 2x 1d record + Food Propensity Questionnaire (#days not specified) |
| <i>Spain 2</i>       | Madrigal 2020           | 2x24HR + correction   |                              |                                                |                                     |                                                                    |
| <i>Sweden</i>        | Enghardt Barbieri, 2003 |                       | 4 d                          |                                                |                                     |                                                                    |
| <i>Turkey</i>        | Rippin 2018             |                       |                              |                                                |                                     | 24HR (+ FFQ for >5y) (#days not specified)                         |
| <i>UK 1</i>          | Gibson 2014a            |                       | 4 d                          |                                                |                                     |                                                                    |
| <i>UK 2</i>          | Gibson 2014b            |                       | 4 d                          |                                                |                                     |                                                                    |
| <i>UK 3</i>          | NDNS                    |                       | 4 d                          |                                                |                                     |                                                                    |

| <i>Country</i>     | <i>Reference</i> | <i>Dietary Recall</i>                                            | <i>Dietary Record</i>                                     | <i>Weighed or semi-weighed Dietary Records</i> | <i>Food Frequency Questionnaire</i> | <i>Other method or method combination</i> |
|--------------------|------------------|------------------------------------------------------------------|-----------------------------------------------------------|------------------------------------------------|-------------------------------------|-------------------------------------------|
| <b>UK 4</b>        | SACN 2019        |                                                                  | 4d                                                        |                                                |                                     |                                           |
| <b>Lebanon</b>     | Nasreddine 2018  | 24HR                                                             |                                                           |                                                |                                     |                                           |
| <b>UAE</b>         | Ali 2013         | 24HR                                                             |                                                           |                                                |                                     |                                           |
| <b>Australia 1</b> | LioRET 2013      | 2 or 3 x24HR                                                     |                                                           |                                                |                                     |                                           |
| <b>Australia 2</b> | Meyer 2014       | 2x24HR                                                           |                                                           |                                                |                                     |                                           |
| <b>Australia 3</b> | Rahmawaty 2013   | 2x24HR                                                           |                                                           |                                                |                                     |                                           |
| <b>Australia 4</b> | Rangan 2014      | 24HR                                                             |                                                           |                                                |                                     |                                           |
| <b>Australia 5</b> | Zhou 2012        |                                                                  |                                                           | 3d WR                                          |                                     |                                           |
| <b>Total</b>       |                  | <b>22</b><br>– 24HR: 10<br>– 24HR + x (24HR): 6<br>– >1x 24HR: 6 | <b>19</b><br>– >1d: 18<br>– 3 d+ (repeat on subsample): 1 | <b>9</b><br>– 1 d: 2<br>– >1d: 7               | <b>7</b>                            | <b>10</b>                                 |

Abbreviations: 24HR: 24-hour dietary recall on whole sample. 24HR + x (24HR): 24 hour dietary recall + x days dietary recall on subsample. x 24HR: x days dietary recall on whole sample. d: day. FFQ: food frequency questionnaire. sWR: semi-weighed record. WR: weighed record.

\*Sorted by alphabetical order of continent, country and author.

**Table S3** Record of supplements\*, fortified foods and breast milk consumption in the included studies\*\*

| <i>Country</i>        | <i>Reference</i>       | <i>Supplements included</i> | <i>Vitamin and mineral supplements included</i> | <i>PUFA oil or N-3 oil or fish oil supplements included</i> | <i>Fortified foods included</i> | <i>Breast milk intake included (children 1-2 y)</i> |
|-----------------------|------------------------|-----------------------------|-------------------------------------------------|-------------------------------------------------------------|---------------------------------|-----------------------------------------------------|
| <i>Gambia</i>         | Prentice 2000          | -                           | -                                               | -                                                           | -                               | Yes                                                 |
| <i>South Africa 1</i> | Dannhauser 2000        | -                           | -                                               | -                                                           | -                               | >2y                                                 |
| <i>South Africa 2</i> | Steyn 2020             | -                           | -                                               | -                                                           | -                               | Yes                                                 |
| <i>Canada 1</i>       | Barr 2018              | No                          | No                                              | No                                                          | No                              | >2y                                                 |
| <i>Canada 2</i>       | Health Canada 2012     | No                          | No                                              | No                                                          | -                               | -                                                   |
| <i>Canada 3</i>       | Innis 2004             | -                           | -                                               | -                                                           | -                               | -                                                   |
| <i>Canada 4</i>       | Lien 2009              | -                           | -                                               | -                                                           | -                               | >2y                                                 |
| <i>Canada 5</i>       | Madden 2009            | -                           | -                                               | -                                                           | -                               | >2y                                                 |
| <i>Canada 6</i>       | Wiedeman 2019          | -                           | -                                               | No                                                          | -                               | -                                                   |
| <i>Mexico 1</i>       | Jimenez-Aguilar 2018   | -                           | -                                               | -                                                           | Yes                             | -                                                   |
| <i>Mexico 2</i>       | Ramirez-Silva          | -                           | -                                               | -                                                           | -                               | >2y                                                 |
| <i>USA 1</i>          | Ahluwalia 2016         | No                          | No                                              | No                                                          | -                               | Yes                                                 |
| <i>USA 2</i>          | Bailey 2018            | Yes                         | Yes                                             | -                                                           | -                               | Yes                                                 |
| <i>USA 3</i>          | Keim 2015              | -                           | -                                               | -                                                           | -                               | No                                                  |
| <i>USA 4</i>          | Thomson 2019           | Yes                         | Yes                                             | Yes                                                         | -                               | -                                                   |
| <i>Argentina</i>      | Cuesta 2018            | -                           | -                                               | -                                                           | -                               | >2y                                                 |
| <i>Brazil</i>         | Bueno 2013             | -                           | -                                               | -                                                           | -                               | >2y                                                 |
| <i>Chile</i>          | Rebolledo 2019         | -                           | -                                               | -                                                           | -                               | >2y                                                 |
| <i>Bangladesh</i>     | Yakes 2011             | -                           | -                                               | -                                                           | -                               | >2y                                                 |
| <i>China</i>          | Barbarich 2006         | -                           | -                                               | -                                                           | -                               | -                                                   |
| <i>Indonesia</i>      | Neufingerl 2016        | -                           | -                                               | -                                                           | -                               | >2y                                                 |
| <i>Japan 1</i>        | Ando 2019              | No                          | No                                              | No                                                          | -                               | >2y                                                 |
| <i>Japan 2</i>        | Murakami 2018b         | No                          | No                                              | No                                                          | -                               | >2y                                                 |
| <i>Japan 3</i>        | NHNS-J 2018            | No                          | No                                              | No                                                          | No                              | -                                                   |
| <i>Japan 4</i>        | Tsuboyama-Kasaoka 2013 | No                          | No                                              | No                                                          | No                              | -                                                   |
| <i>Malaysia</i>       | Mohd Shariff 2015      | No                          | No                                              | No                                                          | -                               | No                                                  |
| <i>Philippines 1</i>  | Angeles-Agdeppa 2019   | No                          | No                                              | No                                                          | -                               | >2y                                                 |
| <i>Philippines 2</i>  | Denney 2018            | No                          | No                                              | No                                                          | -                               | Yes                                                 |
| <i>Singapore 1</i>    | Allan 2017             | Yes                         | -                                               | -                                                           | Yes                             | Yes                                                 |
| <i>Singapore 2</i>    | Lim 2019               | -                           | -                                               | -                                                           | Yes                             | Yes                                                 |
| <i>Singapore 3</i>    | Sugianto 2019          | -                           | -                                               | -                                                           | -                               | >2y                                                 |



| <i>Country</i>       | <i>Reference</i>        | <i>Supplements included</i> | <i>Vitamin and mineral supplements included</i> | <i>PUFA oil or N-3 oil or fish oil supplements included</i> | <i>Fortified foods included</i> | <i>Breast milk intake included (children 1-2 y)</i> |
|----------------------|-------------------------|-----------------------------|-------------------------------------------------|-------------------------------------------------------------|---------------------------------|-----------------------------------------------------|
| <i>South Korea 1</i> | Baek 2018               | No                          | No                                              | No                                                          | -                               | No                                                  |
| <i>South Korea 2</i> | Kim 2019                | No                          | No                                              | No                                                          | -                               | No                                                  |
| <i>Belgium 1</i>     | De Ridder 2015          | Yes                         | Yes                                             | Yes                                                         | Yes                             | >2y                                                 |
| <i>Belgium 2</i>     | Sioen 2007              | Yes                         | Yes                                             | Yes                                                         | Yes                             | >2y                                                 |
| <i>Cyprus</i>        | Tornaritis 2014         | -                           | -                                               | -                                                           | -                               | >2y                                                 |
| <i>Finland 1</i>     | Korkalo 2019            | -                           | -                                               | -                                                           | -                               | >2y                                                 |
| <i>Finland 2</i>     | Kyttala 2008            | Yes                         | Yes                                             | No                                                          | -                               | No                                                  |
| <i>Finland 3</i>     | Naveed 2020             | -                           | -                                               | -                                                           | -                               | >2y                                                 |
| <i>France 1</i>      | Chouraqui 2020          | -                           | -                                               | -                                                           | -                               | No                                                  |
| <i>France 2</i>      | Guesnet 2018            | -                           | -                                               | -                                                           | -                               | >2y                                                 |
| <i>Germany 1</i>     | Libuda 2014             | -                           | -                                               | -                                                           | -                               | >2y                                                 |
| <i>Germany 2</i>     | Stahl 2009              | Yes                         | Yes                                             | -                                                           | Yes                             | >2y                                                 |
| <i>Greece</i>        | Smpokos 2014            | -                           | -                                               | -                                                           | -                               | >2y                                                 |
| <i>Ireland 1</i>     | O'Connor 2020           | Yes                         | Yes                                             | Yes                                                         | Yes                             | >2y                                                 |
| <i>Ireland 2</i>     | Walton 2017             | Yes                         | Yes                                             | -                                                           | Yes                             | Yes                                                 |
| <i>Italy</i>         | Sette 2011              | No                          | No                                              | No                                                          | Yes                             | >2y                                                 |
| <i>NL 1</i>          | Goldbohm 2016           | Yes                         | Yes                                             | -                                                           | Yes                             | Yes                                                 |
| <i>NL 2</i>          | Van Rossum 2020         | Yes                         | Yes                                             | Yes                                                         | Yes                             | -                                                   |
| <i>Poland</i>        | Merkel 2014             | Yes                         | Yes                                             | -                                                           | Yes                             | >2y                                                 |
| <i>Spain 1</i>       | Lopez-Sobaler 2019      | No                          | No                                              | No                                                          | Yes                             | Yes                                                 |
| <i>Spain 2</i>       | Madrigal 2020           | Yes                         | Yes                                             | -                                                           | Yes                             | -                                                   |
| <i>Sweden</i>        | Enghardt Barbieri, 2003 | Yes                         | Yes                                             | -                                                           | -                               | >2y                                                 |
| <i>Turkey</i>        | Rippin 2018             | -                           | -                                               | -                                                           | -                               |                                                     |
| <i>UK 1</i>          | Gibson 2014a            | Yes                         | Yes                                             | -                                                           | Yes                             | -                                                   |
| <i>UK 2</i>          | Gibson 2014b            | Yes                         | Yes                                             | -                                                           | Yes                             | Yes                                                 |
| <i>UK 3</i>          | NDNS                    | Yes                         | Yes                                             | -                                                           | Yes                             | -                                                   |
| <i>UK 4</i>          | SACN 2019               | Yes                         | Yes                                             | -                                                           | Yes                             |                                                     |
| <i>Lebanon</i>       | Nasreddine 2018         | -                           | -                                               | -                                                           | -                               |                                                     |
| <i>UAE</i>           | Ali 2013                | -                           | -                                               | -                                                           | -                               | >2y                                                 |
| <i>Australia 1</i>   | LioRET 2013             | No                          | No                                              | No                                                          | -                               | Yes                                                 |
| <i>Australia 2</i>   | Meyer 2011              | Yes                         | Yes                                             | Yes                                                         | Yes                             | >2y                                                 |
| <i>Australia 3</i>   | Rahmawaty 2013          | No                          | No                                              | No                                                          | Yes                             | >2y                                                 |
| <i>Australia 4</i>   | Rangan 2014             | -                           | -                                               | -                                                           | -                               | >2y                                                 |
| <i>Australia 5</i>   | Zhou 2012               | Yes                         | -                                               | -                                                           | -                               | Yes                                                 |

| <i>Country</i>   | <i>Reference</i> | <i>Supplements included</i> | <i>Vitamin and mineral supplements included</i> | <i>PUFA oil or N-3 oil or fish oil supplements included</i> | <i>Fortified foods included</i> | <i>Breast milk intake included (children 1-2 y)</i> |
|------------------|------------------|-----------------------------|-------------------------------------------------|-------------------------------------------------------------|---------------------------------|-----------------------------------------------------|
| <i>Total Yes</i> |                  | 20                          | 18                                              | 6                                                           | 20                              | 13                                                  |
| <i>Total No</i>  |                  | 16                          | 16                                              | 18                                                          | 3                               | 6                                                   |
| <i>Total -</i>   |                  | 29                          | 31                                              | 41                                                          | 42                              | 12                                                  |

Abbreviations: -: not reported or not found

\*Supplements= “supplements”, “vitamin and mineral supplements” or “n-3 oil” or “fish oil” supplements or “PUFA oil supplements”. \*\*Sorted by alphabetical order of continent, country and author.

**Table S4** Daily intake of total fat, linoleic, alpha-linolenic acid (%E) and docosahexaenoic acid (mg) in children aged 1 to 2 years (mean or median for boys and girls unless otherwise specified)\*

| <i>Country</i>        | <i>Reference</i>               | <i>Total fat</i>     | <i>LA</i>  | <i>ALA</i>  | <i>DHA</i> |
|-----------------------|--------------------------------|----------------------|------------|-------------|------------|
| <i>Gambia</i>         | Prentice 2000                  | 27.5                 | 5.1        | 0.23        | 80         |
| <i>South Africa 2</i> | Steyn 2020                     | 30.3                 | NR         | NR          | NR         |
| <i>Canada 2</i>       | Health Canada 2012             | 30.3                 | NR         | 0.47        | NR         |
| <i>Canada 3</i>       | Innis 2004                     | 32                   | 2.98       | 0.6         | 41         |
| <i>Canada 6</i>       | Wiedeman 2019                  | NR                   | 3.74       | 0.53        | 31         |
| <i>Mexico 1</i>       | Jimenez-Aguilar 2018           | 32.1                 | NR         | NR          | NR         |
| <i>USA 1</i>          | Ahluwalia 2016                 | 32.9                 | 4.98       | 0.65        | NR         |
| <i>USA 2</i>          | Bailey 2018                    | 33                   | NR         | NR          | NR         |
| <i>USA 3</i>          | Keim 2015                      | NR                   | 5.5        | 0.65        | 19.78      |
| <i>USA 4</i>          | Thomson 2019                   | NR                   | NR         | NR          | 19.5       |
| <i>China</i>          | Barbarich 2006                 | 24.0                 | 2.9        | 0.4         | 34         |
| <i>Japan 3</i>        | NHNS-J 2018                    | 28.5                 | 4.5        | 0.57        | NR         |
| <i>Japan 4</i>        | Tsuboyama-Kasaoka 2013         | NR                   | 4.3        | 0.52        | NR         |
| <i>Malaysia</i>       | Mohd Shariff 2015 <sup>1</sup> | 32.61 ; 30.29 ; 32.5 | NR         | NR          | NR         |
| <i>Philippines 2</i>  | Denney 2018                    | 29.6                 | NR         | NR          | NR         |
| <i>Singapore 1</i>    | Allan 2017 <sup>2</sup>        | 29.9; 30.26          | NR         | NR          | 100; 120   |
| <i>Singapore 2</i>    | Lim 2019 <sup>2</sup>          | 30.2 ; 28.9          | NR         | NR          | NR         |
| <i>South Korea 1</i>  | Baek 2018                      | 23.3                 | 3.7        | 0.5         | NR         |
| <i>South Korea 2</i>  | Kim 2019                       | NR                   | 3.5        | 0.47        | 37.02      |
| <i>Finland 2</i>      | Kyttala 2008                   | 29                   | NR         | NR          | NR         |
| <i>France 1</i>       | Chouraqui 2020 <sup>3</sup>    | 28.1 ; 29.8          | 2.8 ; 2.74 | 0.42 ; 0.38 | 36; 37     |

| <i>Country</i>     | <i>Reference</i>             | <i>Total fat</i> | <i>LA</i> | <i>ALA</i> | <i>DHA</i> |
|--------------------|------------------------------|------------------|-----------|------------|------------|
| <i>Ireland 2</i>   | Walton 2017                  | 33.8             | NR        | 0.46       | 30.3       |
| <i>NL 1</i>        | Goldbohm 2016                | 28.7             | 5.1       | 0.7        | 20         |
| <i>NL 2</i>        | Van Rossum 2020 <sup>4</sup> | 29.5; 29.4       | 4.6 ; 4.6 | 0.6 ; 0.6  | 51 ; 63    |
| <i>Spain 1</i>     | Lopez-Sobaler 2019           | 34.6             | NR        | NR         | NR         |
| <i>Spain 2</i>     | Madrigal 2020                | 36.7             | 3.7       | 0.26       | 80         |
| <i>UK 1</i>        | Gibson 2014a                 | 34.1             | 3.8       | 0.7        | NR         |
| <i>UK 2</i>        | Gibson 2014b                 | 35.4             | 3.7       | 0.7        | NR         |
| <i>UK 3</i>        | NDNS                         | 34.4             | NR        | NR         | NR         |
| <i>Australia 1</i> | Lioret 2013                  | 32.75            | NR        | NR         | NR         |
| <i>Australia 5</i> | Zhou 2012                    | 35.5             | 2.11      | 0.42       | NR         |

Abbreviations: ALA: alpha-linolenic acid; DHA: docosahexaenoic acid; LA: linoleic acid;

\*Studies sorted by alphabetical order of continent, country and author. <sup>1</sup>Children from low income, medium income, and high income families. <sup>2</sup>Dietary assessment using two different methods (Dietary recall or record vs. FFQ). <sup>3</sup>Children aged: 12-17 months; 18-23 months. <sup>4</sup>Mean for: boys; girls.

**Table S5** Daily intake of total fat, saturated fats, linoleic acid, alpha-linolenic acid (%E) and sum of docosahexaenoic + eicosapentaenoic acids (mg) in children aged 2 to 3 years (mean or median for boys and girls unless otherwise specified)\*

| <i>Country</i>        | <i>Reference</i>               | <i>Total fat</i>      | <i>SFA</i>            | <i>LA</i> | <i>ALA</i>  | <i>EPA+DHA</i> |
|-----------------------|--------------------------------|-----------------------|-----------------------|-----------|-------------|----------------|
| <i>Gambia</i>         | Prentice 2000                  | 15                    | 3.6                   | 4.6       | 0.13        | NR             |
| <i>South Africa 1</i> | Dannhauser 2000 <sup>1</sup>   | 26.4; 26.0            | 9.6 ; 8.7             | 5.5 ; 6.5 | 0.44 ; 0.35 | NR             |
| <i>South Africa 2</i> | Steyn 2020                     | 30.3                  | 8.9                   | NR        | NR          | NR             |
| <i>Canada 2</i>       | Health Canada 2012             | 30.3                  | 12                    | NR        | 0.47        | NR             |
| <i>Canada 3</i>       | Innis 2004                     | 34.6                  | 13.3                  | 3.5       | 0.79        | 152            |
| <i>Canada 6</i>       | Wiedeman 2019                  | NR                    | NR                    | 4.2       | 0.59        | 100            |
| <i>Mexico 1</i>       | Jimenez-Aguilar 2018           | 32.1                  | 14.6                  | NR        | NR          | NR             |
| <i>USA 2</i>          | Bailey 2018                    | 31                    | 11                    | NR        | NR          | NR             |
| <i>USA 3</i>          | Keim 2015                      | NR                    | NR                    | 5.5       | 0.59        | 26.22          |
| <i>USA 4</i>          | Thomson 2019                   | NR                    | NR                    | NR        | NR          | 24.7           |
| <i>Brazil</i>         | Bueno 2013 <sup>2</sup>        | 28.1 ; 28.5           | 9.9 ; 9.9             | NR        | NR          | NR             |
| <i>Bangladesh</i>     | Yakes 2011                     | 17.2                  | 5.7                   | 3.3       | 0.4         | NR             |
| <i>China</i>          | Barbarich 2006                 | 24.0                  | NR                    | 2.9       | 0.4         | NR             |
| <i>Japan 3</i>        | NHNS-J 2018                    | 28.5                  | 9.6                   | 4.5       | 0.57        | NR             |
| <i>Japan 4</i>        | Tsuboyama-Kasaoka 2013         | NR                    | NR                    | 4.3       | 0.52        | NR             |
| <i>Malaysia</i>       | Mohd Shariff 2015 <sup>3</sup> | 32.61;<br>30.29; 32.5 | 13.37; 12.5;<br>11.95 | NR        | NR          | NR             |

| <i>Country</i>       | <i>Reference</i>             | <i>Total fat</i> | <i>SFA</i>   | <i>LA</i>   | <i>ALA</i>  | <i>EPA+DHA</i> |
|----------------------|------------------------------|------------------|--------------|-------------|-------------|----------------|
| <i>Philippines 2</i> | Denney 2018                  | 23.4             | 9.4          | NR          | NR          | NR             |
| <i>Singapore 1</i>   | Allan 2017 <sup>4</sup>      | 29.9; 30.26      | 12.09; 12.28 | NR          | NR          | NR             |
| <i>Belgium 2</i>     | Sioen 2007                   | NR               | NR           | 4.03        | 0.48        | 65             |
| <i>Finland 2</i>     | Kyttala 2008                 | 30               | 13.2         | NR          | NR          | NR             |
| <i>France 1</i>      | Chouraqui 2020 <sup>5</sup>  | 32.6 ; 30.6      | NR           | 2.48 ; 2.17 | 0.34 ; 0.31 | NR             |
| <i>Germany 1</i>     | Libuda 2014                  | 34.6             | 15.2         | NR          | NR          | NR             |
| <i>Ireland 2</i>     | Walton 2017                  | 32.8             | 14.8         | NR          | 0.46        | 68.2           |
| <i>NL 1</i>          | Goldbohm 2016                | 28.9             | 10.3         | 5           | 0.7         | 30             |
| <i>NL 2</i>          | Van Rossum 2020 <sup>6</sup> | 29.5; 29.4       | 11.1; 11.0   | 4.6;4.6     | 0.6; 0.6    | 51; 63         |
| <i>Spain 1</i>       | Lopez-Sobaler 2019           | 34.6             | 11.9         | NR          | NR          | NR             |
| <i>Spain 2</i>       | Madrigal 2020                | 36.7             | 13.1         | 3.7         | 0.26        | 130            |
| <i>Turkey</i>        | Rippin 2018 <sup>6</sup>     | 37.4 ; 37.0      | 12.9 ; 12.8  | 9.1 ; 8.7   | 0.7 ; 0.7   | NR             |
| <i>UK 1</i>          | Gibson 2014a                 | 34.1             | 15.1         | 3.8         | 0.7         | NR             |
| <i>UK 3</i>          | NDNS                         | 34.4             | 14.5         | NR          | NR          | NR             |
| <i>Lebanon</i>       | Nasreddine 2018              | 38.8             | 12.7         | NR          | NR          | NR             |
| <i>Australia 2</i>   | Meyer 2011                   | NR               | NR           | 3.3         | 0.53        | NR             |
| <i>Australia 3</i>   | Rahmawaty 2013               | NR               | NR           | NR          | NR          | 47.7           |
| <i>Australia 4</i>   | Rangan 2014                  | 30.4             | 13.8         | NR          | NR          | NR             |
| <i>Australia 5</i>   | Zhou 2012                    | 34.5             | 17.2         | 2.34        | 0.42        | NR             |

Abbreviations: ALA: alpha-linolenic acid; DHA: docosahexaenoic acid; EPA: eicosapentaenoic acid; LA: linoleic acid; SFA: saturated fatty acids

\*Studies sorted by alphabetical order of continent, country and author. <sup>1</sup>Children from: Joe Slovo settlement; JB Mafora settlement. <sup>2</sup>Children from: public schools; private schools. <sup>3</sup>Children from families with: low income; medium income; high income. <sup>4</sup>Dietary assessment using two different methods (Dietary recall or record vs. FFQ). <sup>5</sup>Children aged: 24-29 months; 30-35 months. <sup>6</sup>Mean for: boys; girls.

**Table S6** Daily intake of total fat, saturated fats, linoleic acid, alpha-linolenic acid (%E) and docosahexaenoic + eicosapentaenoic acids (mg) in children aged 3 to 5 years (mean or median for boys and girls unless otherwise specified)\*

| <i>Country</i>        | <i>Reference</i>     | <i>Total fat</i>                                                             | <i>SFA</i>                                                                | <i>LA</i>                                                                 | <i>ALA</i>                                                                | <i>EPA+DHA</i> |
|-----------------------|----------------------|------------------------------------------------------------------------------|---------------------------------------------------------------------------|---------------------------------------------------------------------------|---------------------------------------------------------------------------|----------------|
| <i>South Africa 1</i> | Dannhauser 2000      | 26.4 <sup>1</sup> ;26.0 <sup>2</sup> ; 25.3 <sup>3</sup> ; 23.8 <sup>4</sup> | 9.6 <sup>1</sup> ; 8.7 <sup>2</sup> ; 9.0 <sup>3</sup> ; 7.9 <sup>4</sup> | 5.5 <sup>1</sup> ; 6.5 <sup>2</sup> ; 6.2 <sup>3</sup> ; 5.8 <sup>4</sup> | 0.44 <sup>1</sup> ;0.35 <sup>2</sup> 0.30 <sup>3</sup> ;0.26 <sup>4</sup> | NR             |
| <i>South Africa 2</i> | Steyn 2020           | 28.7                                                                         | 8.5                                                                       | NR                                                                        | NR                                                                        | NR             |
| <i>Canada 2</i>       | Health Canada 2012   | 30.1                                                                         | 12                                                                        | NR                                                                        | 0.49                                                                      | NR             |
| <i>Canada 3</i>       | Innis 2004           | 32.4                                                                         | 12                                                                        | 3.7                                                                       | 0.7                                                                       | 156            |
| <i>Canada 5</i>       | Madden 2009          | 22.8                                                                         | 8.4                                                                       | 4.9                                                                       | 0.74                                                                      | 92.5           |
| <i>Mexico 1</i>       | Jimenez-Aguilar 2018 | 32.2                                                                         | 14.2                                                                      | NR                                                                        | NR                                                                        | NR             |

| <i>Country</i>       | <i>Reference</i>                | <i>Total fat</i>            | <i>SFA</i>                | <i>LA</i> | <i>ALA</i> | <i>EPA+DHA</i> |
|----------------------|---------------------------------|-----------------------------|---------------------------|-----------|------------|----------------|
| <b>USA 2</b>         | Bailey 2018                     | 31                          | 11                        | NR        | NR         | NR             |
| <b>USA 3</b>         | Keim 2015                       | NR                          | NR                        | 6.2       | 0.59       | 27.21          |
| <b>USA 4</b>         | Thomson 2019                    | NR                          | NR                        | NR        | NR         | 24.7           |
| <b>Brazil</b>        | Bueno 2013 <sup>5</sup>         | 28.6 ; 28.8                 | 9.8 ; 9.8                 | NR        | NR         | NR             |
| <b>Chile</b>         | Rebolledo 2019                  | NR                          | 9.9                       | NR        | NR         | NR             |
| <b>Bangladesh</b>    | Yakes 2011                      | 12.9                        | 3.4                       | 2.9       | 0.41       | NR             |
| <b>China</b>         | Barbarich 2006                  | 21                          | NR                        | 2.5       | 0.4        | NR             |
| <b>Indonesia</b>     | Neufingerl 2016                 | 27.2                        | 11.6                      | 3.3       | 0.2        | 30             |
| <b>Japan 1</b>       | Ando 2019                       | NR                          | NR                        | 4.7       | 0.5        | 148.4          |
| <b>Japan 2</b>       | Murakami 2018b <sup>6</sup>     | 29.3 ; 29.2                 | 9.9 ; 9.6                 | 4.3 ; 4.5 | 0.5 ; 0.5  | NR             |
| <b>Japan 3</b>       | NHNS-J 2018                     | 28.5                        | 9.6                       | 4.5       | 0.57       | NR             |
| <b>Japan 4</b>       | Tsuboyama-Kasaoka 2013          | NR                          | NR                        | 4.5       | 0.55       | NR             |
| <b>Malaysia</b>      | Mohd Shariff 2015 <sup>7</sup>  | 32.34 ;<br>30.79 ;<br>33.32 | 11.88;<br>10.68;<br>11.65 | NR        | NR         | NR             |
| <b>Philippines 2</b> | Denney 2018                     | 20.2                        | 9.9                       | NR        | NR         | NR             |
| <b>South Korea 1</b> | Baek 2018                       | 23                          | 8.3                       | 4         | 0.6        | NR             |
| <b>Belgium 1</b>     | De Ridder 2015                  | 32.7                        | 13.5                      | NR        | NR         | NR             |
| <b>Belgium 2</b>     | Sioen 2007                      | NR                          | NR                        | 4.03      | 0.48       | 65             |
| <b>Finland 1</b>     | Korkalo 2019                    | 31.7                        | 11.7                      | NR        | NR         | NR             |
| <b>Finland 2</b>     | Kyttala 2008                    | 31                          | 13.2                      | NR        | NR         | NR             |
| <b>France 2</b>      | Guesnet 2018                    | 38.4                        | NR                        | 3.7       | 0.4        | 184            |
| <b>Germany 1</b>     | Libuda 2014                     | 33.8                        | 14.8                      | NR        | NR         | NR             |
| <b>Ireland 2</b>     | Walton 2017 <sup>8</sup>        | 31.8; 31.5                  | 14.5; 14.1                | NR        | 0.44; 0.44 | 68; 79.8       |
| <b>Italy</b>         | Sette 2011                      | 37.4                        | 11.9                      | NR        | NR         | NR             |
| <b>NL 1</b>          | Goldbohm 2016                   | 29.3                        | 10.4                      | 5.1       | 0.7        | 30             |
| <b>NL 2</b>          | Van Rossum 2020 <sup>6</sup>    | 31.7; 31.8                  | 11.8; 11.8                | 5.0; 5.1  | 0.6; 0.6   | 74; 81         |
| <b>Spain 1</b>       | Lopez-Sobaler 2019 <sup>6</sup> | 34.8; 35.6                  | 13.1; 13.1                | NR        | NR         | NR             |
| <b>Spain 2</b>       | Madrigal 2020                   | 36.8                        | 13.5                      | 3.8       | 0.27       | 130            |
| <b>Sweden</b>        | Enghardt Barbieri 2003          | 31.7                        | 14.4                      | 3         | 0.6        | 140            |
| <b>Turkey</b>        | Rippin 2018 <sup>6</sup>        | 37.4 ; 37.0                 | 12.9 ; 12.8               | 9.1 ; 8.7 | 0.7 ; 0.7  | NR             |
| <b>UK 3</b>          | NDNS                            | 33.4                        | 13                        | NR        | NR         | NR             |
| <b>UK 4</b>          | SACN 2019                       | NR                          | NR                        | 4.4       | 0.8        | NR             |
| <b>Lebanon</b>       | Nasreddine 2018                 | 38.8                        | 12.7                      | NR        | NR         | NR             |
| <b>Australia 2</b>   | Meyer 2011                      | NR                          | NR                        | 3.5       | 0.57       | NR             |
| <b>Australia 3</b>   | Rahmawaty 2013                  | NR                          | NR                        | NR        | NR         | 55.1           |
| <b>Australia 4</b>   | Rangan 2014                     | 30.4                        | 13.8                      | NR        | NR         | NR             |
| <b>Australia 5</b>   | Zhou 2012                       | 32.1                        | 14.9                      | 2.6       | 0.34       | NR             |

Abbreviations: ALA: alpha-linolenic acid; DHA: docosahexaenoic acid; EPA: eicosapentaenoic acid; LA: linoleic acid; SFA: saturated fatty acids

\*Studies sorted by alphabetical order of continent, country and author. <sup>1</sup>Children 2 to 3.9 years from Joe Slovo settlement. <sup>2</sup>Children 2 to 3.9 years from JB Mafora settlement. <sup>3</sup>Children 4 to 5.9 years from Joe Slovo settlement. <sup>4</sup>Children 4 to 5.9 years from JB Mafora settlement. <sup>5</sup>Children from: public schools; private schools. <sup>6</sup>Mean for: boys; girls. <sup>7</sup>Children from families with: low income; medium income; high income. <sup>8</sup>Children aged: 3 years; 4 years.

**Table S7** Daily intake of total fat, saturated fats, linoleic acid, alpha-linolenic acid (%E) and docosahexaenoic + eicosapentaenoic acids (mg) in children aged 5 to 7 years (mean or median for boys and girls unless otherwise specified)\*

| <i>Country</i>        | <i>Reference</i>               | <i>Total fat</i>            | <i>SFA</i>                | <i>LA</i> | <i>ALA</i>  | <i>DHA</i> |
|-----------------------|--------------------------------|-----------------------------|---------------------------|-----------|-------------|------------|
| <i>South Africa 1</i> | Dannhauser 2000 <sup>1</sup>   | 25.3;23.8                   | 9.0 ; 7.9                 | 6.2 ; 5.8 | 0.30 ; 0.26 | NR         |
| <i>South Africa 2</i> | Steyn 2020                     | 28.7                        | 8.5                       | NR        | NR          | NR         |
| <i>Canada 1</i>       | Barr 2018                      | 30.1                        | 10.9                      | NR        | NR          | NR         |
| <i>Canada 2</i>       | Health Canada 2012             | 30.1                        | 12                        | NR        | 0.49        | NR         |
| <i>Canada 4</i>       | Lien 2009                      | 33                          | 12                        | 3.9       | 0.36        | 54         |
| <i>Canada 5</i>       | Madden 2009                    | 22.8                        | 8.4                       | 4.9       | 0.74        | 92.5       |
| <i>Mexico 2</i>       | Ramirez-Silva 2011             | 26.7                        | 11.4                      | 3.2       | 0.2         | NR         |
| <i>USA 4</i>          | Thomson 2019                   | NR                          | NR                        | NR        | NR          | 50.8       |
| <i>Argentina</i>      | Cuesta 2018 <sup>2</sup>       | 36.7 ; 37.6                 | 11.4 ; 13.1               | NR        | NR          | NR         |
| <i>Brazil</i>         | Bueno 2013 <sup>3</sup>        | 28.6 ; 28.8                 | 9.8 ; 9.8                 | NR        | NR          | NR         |
| <i>Indonesia</i>      | Neufingerl 2016                | 27.2                        | 11.6                      | 3.3       | 0.2         | 30         |
| <i>Japan 2</i>        | Murakami 2018b <sup>2</sup>    | 29.3 ; 29.2                 | 9.9 ; 9.6                 | 4.3 ; 4.5 | 0.5 ; 0.5   | NR         |
| <i>Japan 3</i>        | NHNS-J 2018                    | 28.5                        | 9.6                       | 4.5       | 0.57        | NR         |
| <i>Japan 4</i>        | Tsuboyama-Kasaoka 2013         | NR                          | NR                        | 4.5       | 0.67        | NR         |
| <i>Malaysia</i>       | Mohd Shariff 2015 <sup>4</sup> | 32.34 ;<br>30.79 ;<br>33.32 | 11.88;<br>10.66;<br>11.65 | NR        | NR          | NR         |
| <i>Philippines 1</i>  | Angeles-Agdeppa 2019           | 17.8                        | 9.27                      | NR        | NR          | NR         |
| <i>Singapore 3</i>    | Sugianto 2019 <sup>5</sup>     | 26.5 ; 25.0                 | 9.1 ; 9.3                 | NR        | NR          | NR         |
| <i>Belgium 1</i>      | De Ridder 2015                 | 34.6                        | 13.2                      | NR        | NR          | NR         |
| <i>Belgium 2</i>      | Sioen 2007                     | NR                          | NR                        | 4.25      | 0.54        | 75         |
| <i>Cyprus</i>         | Tornaritis 2014 <sup>2</sup>   | 34.7 ; 34.1                 | 14 ; 13.7                 | NR        | NR          | NR         |
| <i>Finland 1</i>      | Korkalo 2019                   | 31.9                        | 11.5                      | NR        | NR          | NR         |
| <i>Finland 2</i>      | Kyttala 2008                   | 31                          | 13.7                      | NR        | NR          | NR         |
| <i>Finland 3</i>      | Naveed 2020                    | 30                          | 12.2                      | 3.6       | 0.78        | 140        |
| <i>France 2</i>       | Guesnet 2018                   | 38.2                        | NR                        | 3.5       | 0.4         | 144        |
| <i>Germany 1</i>      | Libuda 2014                    | 33.8                        | 14.8                      | NR        | NR          | NR         |

| <i>Country</i>     | <i>Reference</i>                | <i>Total fat</i> | <i>SFA</i>  | <i>LA</i> | <i>ALA</i>  | <i>DHA</i> |
|--------------------|---------------------------------|------------------|-------------|-----------|-------------|------------|
| <i>Germany 2</i>   | Stahl 2009                      | 32               | 14          | NR        | NR          | NR         |
| <i>Greece</i>      | Smpokos 2014 <sup>2</sup>       | 42.8 ; 43.1      | 15.4 ; 15.3 | 3.5 ; 3.5 | 0.38 ; 0.28 | NR         |
| <i>Ireland 1</i>   | O'Connor 2020                   | 33.1             | 14.2        | 3.5       | 0.6         | 100.3      |
| <i>Italy</i>       | Sette 2011                      | 37.4             | 11.9        | NR        | NR          | NR         |
| <i>NL 2</i>        | Van Rossum 2020 <sup>2</sup>    | 31.7; 31.8       | 11.8; 11.8  | 5.0; 5.1  | 0.6; 0.6    | 74; 81     |
| <i>Poland</i>      | Merkel 2014                     | 32.7             | 14.5        | NR        | NR          | NR         |
| <i>Spain 1</i>     | Lopez-Sobaler 2019 <sup>2</sup> | 34.8; 35.6       | 13.1; 13.1  | NR        | NR          | NR         |
| <i>Spain 2</i>     | Madrigal 2020                   | 36.8             | 13.5        | 3.8       | 0.27        | 130        |
| <i>Turkey</i>      | Rippin 2018 <sup>3</sup>        | 35.2 ; 35.8      | 12.0 ; 11.7 | 8.8 ; 9.3 | 0.6 ; 0.7   | NR         |
| <i>UK 3</i>        | NDNS                            | 33.4             | 13          | NR        | NR          | NR         |
| <i>UK 4</i>        | SACN 2019                       | NR               | NR          | 4.4       | 0.8         | NR         |
| <i>UAE</i>         | Ali 2013 <sup>3</sup>           | 26.3; 24.4       | 9.77; 8.9   | NR        | NR          | NR         |
| <i>Australia 2</i> | Meyer 2011                      | NR               | NR          | 3.5       | 0.57        | NR         |
| <i>Australia 3</i> | Rahmawaty 2013                  | NR               | NR          | NR        | NR          | 55.1       |
| <i>Australia 4</i> | Rangan 2014                     | 30.4             | 13.8        | NR        | NR          | NR         |

Abbreviations: ALA: alpha-linolenic acid; DHA: docosahexaenoic acid; EPA: eicosapentaenoic acid; LA: linoleic acid; SFA: saturated fatty acids

\*Studies sorted by alphabetical order of continent, country and author. <sup>1</sup>Children from: Joe Slovo settlement; JB Mafora settlement. <sup>2</sup>Mean for: boys; girls. <sup>3</sup>Children from: public schools; private schools. <sup>4</sup>Children from families with: low income; medium income; high income. <sup>5</sup>Dietary assessment using two different methods (Dietary recall or record vs. FFQ)
